1 Comparative plant transcriptome profiling of *Arabidopsis* and *Camelina*  
2 infested with *Myzus persicae* aphids acquiring circulative and non-circulative  
3 viruses reveals virus- and plant-specific alterations relevant to aphid feeding  
4 behavior and transmission

5  
6 Quentin Chesnais <sup>1,a</sup>, Victor Golyaev <sup>2,a</sup>, Amandine Velt <sup>1</sup>, Camille Rustenholz <sup>1</sup>, Véronique  
7 Brault <sup>1</sup>, Mikhail Pooggin <sup>2,b</sup>, Martin Drucker <sup>1,b</sup>

8  
9  
10 <sup>1</sup> SVQV, UMR1131, INRAE Centre Grand Est – Colmar, Université Strasbourg, France

11 <sup>2</sup> PHIM, INRAE Centre Occitanie – Montpellier, CIRAD, IRD, Université Montpellier, Institut  
12 Agro, France

13  
14 <sup>a</sup> Contributed equally

15 <sup>b</sup> Correspondence: [martin.drucker@inrae.fr](mailto:martin.drucker@inrae.fr), [mikhail.pooggin@inrae.fr](mailto:mikhail.pooggin@inrae.fr)

16

17 **Abstract**

18 **Background:** Evidence accumulates that plant viruses alter host-plant traits in ways that modify their  
19 insect vectors' behavior. These alterations often enhance virus transmission, which has led to the  
20 hypothesis that these effects are manipulations caused by viral adaptation. However, the genetic basis  
21 of these indirect, plant-mediated effects on vectors and their dependence on the plant host and the  
22 mode of virus transmission is hardly known.

23  
24 **Results:** Transcriptome profiling of *Arabidopsis thaliana* and *Camelina sativa* plants infected with  
25 turnip yellows virus (TuYV) or cauliflower mosaic virus (CaMV) and infested with the common  
26 aphid vector *Myzus persicae* revealed strong virus- and host-specific differences in the gene  
27 expression patterns. CaMV infection caused more severe effects on the phenotype of both plant hosts  
28 than did TuYV infection, and the severity of symptoms correlated strongly with the proportion of  
29 differentially expressed genes, especially photosynthesis genes. Accordingly, CaMV infection  
30 modified aphid behavior and fecundity stronger than did infection with TuYV.

31  
32 **Conclusions:** Overall, infection with CaMV – relying on the non-circulative transmission mode –  
33 tends to have effects on metabolic pathways with strong potential implications for insect-vector /  
34 plant-host interactions (e.g. photosynthesis, jasmonic acid, ethylene and glucosinolate biosynthetic  
35 processes), while TuYV – using the circulative transmission mode – alters these pathways only  
36 weakly. These virus-induced deregulations of genes that are related to plant physiology and defense  
37 responses might impact aphid probing and feeding behavior on both infected host plants, with  
38 potentially distinct effects on virus transmission.

39  
40 **Keywords:** Caulimovirus, polerovirus, aphid vector, transmission, feeding behavior, insect-plant  
41 interactions, transcriptome profiling, RNA-seq.

42

## 43 Introduction

44 Most plant viruses rely on vectors for transmission to a new host (for example Dietzgen et al., 2016).  
45 Phloem-feeding insects, such as whiteflies and aphids, are important vectors transmitting at least 500  
46 virus species (Ferreles and Raccah, 2015). The high virus transmission capacity is due to their  
47 particular non-destructive feeding behavior that allows virus acquisition from and inoculation into  
48 the cytoplasm and/or the phloem sap of a new host plant. In fact, aphids alighting on a new plant will  
49 first evaluate the potential host for suitability by exploratory intracellular punctures into the epidermis  
50 and underlying tissues. If the plant is accepted, aphids plunge their needle-like mouthparts, the so-  
51 called stylets, for prolonged feeding phases into the sieve cells whose sap constitutes their principal  
52 nutritive source (for review Dáder et al., 2017). Aphids secrete different saliva types during both the  
53 probing and the feeding phases that contain effector molecules controlling interactions with the plant  
54 and susceptibility (Rodriguez and Bos, 2013).

55 Viruses are classified according to two principal modes of transmission (for review Blanc et al.,  
56 2014). Circulative viruses such as turnip yellows virus (TuYV, genus *Polerovirus*) are acquired by  
57 aphid (or other insect) vectors from the phloem sap of infected plants. They bind to specific receptors  
58 on the intestine epithelium (Milot et al., 2018), traverse the intestine and cycle through the hemocoel  
59 to subsequently reach and invade the salivary glands (Brault et al., 2007). New hosts are inoculated  
60 when viruliferous aphids migrate between plants and inoculate the virus during salivation phases into  
61 the phloem, the only tissue where TuYV and many other circulative viruses are able to replicate. For  
62 this mode of transmission, virus acquisition and inoculation periods are rather long (in the range of  
63 several hours to days), requiring that aphids settle sustainably on the plants. On the other hand, despite  
64 the fact that poleroviruses do not seem to replicate in the vector, aphids having acquired poleroviruses  
65 remain infectious during their entire lifespan. Therefore, this transmission mode is also referred to as  
66 persistent transmission.

67 The transmission mode of non-circulative viruses such as cucumber mosaic virus (CMV, genus  
68 *Cucumovirus*), that are also transmitted by aphids and other hemipteran vectors, is entirely different  
69 (for review Ng and Falk, 2006). They are mostly acquired and inoculated during early probing phases  
70 [i.e. intracellular penetrations in the epidermis and mesophyll tissues (Martin et al., 1997)]. They do  
71 not invade aphid cells but are retained externally in the mouthparts (stylets and/or esophagus), from  
72 where they are also released into a new host. For this reason, non-circulative viruses are acquired and  
73 inoculated within seconds to minutes, and vectors retain and transmit the virus only for a limited time  
74 (minutes range). Therefore, this transmission mode is also named non-persistent transmission. Some  
75 non-circulative viruses may be retained by the vectors during several hours and are referred to as  
76 semi-persistent viruses. The aphid-transmitted cauliflower mosaic virus (CaMV, genus  
77 *Caulimovirus*) belongs to this group (Kennedy et al., 1962; Moreno et al., 2012).

78 Available data indicate that many viruses modify host traits (i.e. color, volatiles,  
79 primary/secondary metabolites etc.) in ways that are conducive for their transmission (for review  
80 Dáder et al., 2017; Fereres and Moreno, 2009; Mauck et al., 2012). Theoretical considerations suggest  
81 that these modifications depend on the virus species and in particular on the mode of virus  
82 transmission by vectors (Dáder et al., 2017; Mauck et al., 2012). Circulative, persistent and phloem-  
83 restricted viruses should profit in particular from faster access of vectors to the phloem and longer  
84 feeding, which would promote both virus acquisition and inoculation. In addition, these viruses would  
85 tend to improve nutrient quality of the host and consequently vector fitness and fecundity,  
86 concomitant with an increased number of viruliferous vectors (Dáder et al., 2017; Fereres and  
87 Moreno, 2009; Mauck et al., 2018). Both modifications have been reported for aphid-transmitted  
88 luteoviruses (Bosque-Pérez and Eigenbrode, 2011). Non-persistent or semi-persistent, non-  
89 circulative viruses with their fast transmission kinetics are expected to benefit from the attraction of  
90 vectors to infected plants, followed by a rapid dispersion, before the virus is lost from the vector  
91 during subsequent salivation events. The best-studied example is CMV, where altered volatiles incite  
92 aphids to alight on infected plants and acquire CMV, before the poor taste and low nutritive value

93 encourage the aphids to leave and transmit the virus, attached to the stylets during this brief probing  
94 time, to other (healthy) host plants (Carr et al., 2020; Mauck et al., 2010; Mauck et al., 2014).

95 While there is overwhelming evidence that some viruses do achieve plant phenotype manipulation  
96 in ways that are conducive for their own transmission, many significant knowledge gaps remain  
97 (discussed by Mauck and Chesnais, 2020). In particular, the mechanisms and pathways by which  
98 viruses alter aspects of the host phenotype and the virus components that manipulate the host remain  
99 poorly understood (Mauck et al., 2019).

100 In the present study, we addressed these shortcomings and initiated analysis of the effects of two  
101 viruses, TuYV and CaMV, belonging to two different transmission categories, on transcriptomic  
102 profiles in two susceptible host plant species (*Arabidopsis thaliana* and *Camelina sativa*, both family  
103 *Brassicaceae*), and on changes in insect vector feeding behavior and performances. We selected the  
104 green peach aphid *Myzus persicae* as vector because it transmits both TuYV and CaMV and infests  
105 both plant hosts. We chose two different plant species as virus hosts, as previous studies have  
106 highlighted potential host-specific effects of viruses on host plant traits and vector performance  
107 (Chesnais et al., 2019b; Chesnais et al., 2021). In addition, their phylogenetic proximity allows rather  
108 easy gene-to-gene comparisons. In fact, the *C. sativa* genome is highly similar to the *A. thaliana*  
109 genome and might have arisen from hybridization of three diploid ancestors of *A. thaliana* (Malik et  
110 al., 2018). For this reason, its genome is allohexaploid. Over 70 % of *C. sativa* genes are syntenically  
111 orthologous to *A. thaliana* genes (Kagale et al., 2014), facilitating genomic studies of *C. sativa*.

## 112 **Material and methods**

### 113 ***Aphids***

114 A Dutch green peach aphid clone (*Myzus persicae* Sulzer, 1776) was used for the experiments. It was  
115 reared on Chinese cabbage (*Brassica rapa* L. *pekinensis* var. Granaat) in a growth chamber at 20±1  
116 °C and a 16 h photoperiod. Only wingless forms were used in assays. For synchronization, adults  
117 were placed on detached Chinese cabbage leaves that were laid on 1 % agarose in a Petri dish. The  
118 adults were removed 24 h later and the newborn larvae used in experiments 5 days (for transcriptomic  
119 experiments) or 8 days (for feeding behavior and performances experiments) later.

### 120 ***Viruses***

121 CaMV isolate Cm1841-Rev (Chesnais et al., 2021), which is a transmissible derivative of isolate  
122 Cm1841 (Tsuge et al., 1994), and TuYV isolate TuYV-FL1 (Veidt et al., 1988) were maintained in  
123 *A. thaliana* Col-0 and propagated by aphid inoculation of 2-week-old plants. Growth conditions were  
124 as described below.

### 125 ***Virus infection and aphid infestation***

126 Seeds of *Arabidopsis thaliana* Col-0 (hereafter *Arabidopsis*) or *Camelina sativa* var. Celine (hereafter  
127 *Camelina*) were germinated in TS 3 fine substrate (Klasmann-Deilmann) in 7\*7 cm pots and watered  
128 with tap water. Growth conditions were 14 h day 10 h night with LED illumination and a constant  
129 temperature of 21±1 °C. Two-week-old plants were inoculated with 3-5 wingless *Myzus persicae*  
130 aphids that had been allowed a 24 h acquisition access period on *Arabidopsis* infected with TuYV or  
131 CaMV or on healthy *Arabidopsis*. Plants were individually wrapped in clear plastic vented bread bags  
132 to prevent cross contamination. Aphids were manually removed after a 48 h inoculation period.  
133 Eighteen days post-inoculation (dpi), 25 to 30 5-day-old non-viruliferous aphids were placed for  
134 infestation on the rosette (*Arabidopsis*) or the apical leaves (*Camelina*) of CaMV- or TuYV-infected  
135 or mock-inoculated plants. After 72 h infestation (= 21 dpi), aphids were removed with a brush. The  
136 infested plants (virus-infected or mock-inoculated) were washed 3 times with deionized water and 3  
137 times with MilliQ water to remove any remaining aphid exuvia and honeydew. Then rosettes  
138 (*Arabidopsis*) or detached leaves (*Camelina*) were collected in 50 ml Falcon tubes. Three biological  
139 replicates were used for analysis. For *Arabidopsis*, one biological replicate consisted of 4 plants, for  
140 *Camelina* one replicate was 3 plants. Plant samples were conserved at -80 °C until processing.

## 141 **RNA purification and Illumina sequencing**

142 Total RNA was extracted from one gram of Arabidopsis (rosettes) and Camelina (leaves) frozen  
143 tissues using a CTAB-LiCl protocol (Morante-Carriel et al., 2014) modified as described in detail by  
144 Golyaev et al. (2019). Briefly, the plant material was ground in liquid nitrogen, homogenized in 10  
145 ml CTAB buffer and centrifuged for 10 min at 5,000 g and 4 °C. The supernatant was mixed with  
146 one volume of chloroform:isoamyl alcohol (24:1) followed by nucleic acid precipitation with 0.1  
147 volume of 3 M sodium acetate (NaOAc, pH 5.2) and 0.6 volume of isopropanol, incubation at -20  
148 °C for 1 h and centrifugation for 20 min at 20,000 g and 4 °C. The pellet was resuspended in 1 ml of  
149 RNase-free water followed by selective precipitation of RNA by addition of 0.3 volume of 10 M  
150 LiCl, overnight incubation at 4 °C and centrifugation for 30 min at 20,000 g and 4 °C. The RNA  
151 pellet was resuspended in 0.1 ml of RNase-free water, 0.1 volume of 3 M NaOAc (pH 5.2) and 2  
152 volumes of cold absolute ethanol, centrifuged for 20 min at 20,000 g and 4 °C, washed with ice-cold  
153 70 % ethanol, air-dried and dissolved in 50 µl RNase-free water.

154 Total RNA samples were subjected to quality control and Illumina sequencing at Fasteris  
155 ([www.fasteris.com](http://www.fasteris.com)) using a standard, stranded mRNA library preparation protocol and multiplexing  
156 the resulting 18 libraries (3 biological replicates per each of the six conditions) in one NovaSeq  
157 flowcell SP-200 with 2x75 nt paired-end customized run mode. The resulting 75 nt reads from each  
158 library were mapped with or without mismatches to the reference genomes of Arabidopsis (TAIR10.1  
159 nuclear genome (5 chromosomes), chloroplast (Pltd) and mitochondrion (NT):  
160 [https://www.ncbi.nlm.nih.gov/genome/?term=txid3702\[Organism:noexp\]](https://www.ncbi.nlm.nih.gov/genome/?term=txid3702[Organism:noexp])), Camelina (nuclear  
161 genome (20 chromosomes):  
162 [https://www.ncbi.nlm.nih.gov/genome/?term=txid71323\[Organism:exp\]](https://www.ncbi.nlm.nih.gov/genome/?term=txid71323[Organism:exp])), CaMV [strain  
163 CM1841rev (Chesnais et al., 2021)] and TuYV [NC\_003743, (Veidt et al., 1988)]. Note that the  
164 CaMV reference sequence was extended at the 3'-end by 74 nts from the 5'-terminus to account for  
165 its circular genome and allow for mapping reads containing the first and last nucleotides of the linear  
166 sequence. In the case of TuYV, some discrepancies with the reference sequence were detected, when  
167 the reads were mapped to the viral reference sequence. Therefore, the reads were used to generate a  
168 new consensus master genome in the viral quasispecies population. For both viruses, the consensus  
169 genome sequences (Supplementary Sequence information S1) were used for (re-)mapping and  
170 counting total viral reads as well as viral reads representing forward and reverse strands of the viral  
171 genomes (Supplementary Dataset S1).

## 172 **RT-qPCR**

173 Expression of Arabidopsis genes was monitored by RT-qPCR analysis. cDNA was synthesized from  
174 10 µg total RNA using AMV Reverse Transcriptase (Promega) and oligo-dT. Real-time qPCR  
175 reactions were completed in the LightCycler® 480 instrument (Roche) using the SybrGreen master  
176 mix (Roche) and following the recommended protocol. Each reaction (10 µl) included 3 µl of cDNA  
177 and 0.5 µl of 10 µM primers (Supplementary Table S1). The thermocycler conditions were as follows:  
178 pre-incubation at 95 °C for 5 min, followed by 40 cycles of 95 °C for 10 s, 58-60 °C for 20 s and 72  
179 °C for 20 s. The expression was normalized to the Arabidopsis internal reference gene PEX4  
180 (AT5G25760) (Supplementary Table S1).

## 181 **Raw data processing and quality control for transcriptome profiling**

182 Processing was carried out on the Galaxy France platform (<https://usegalaxy.fr/>) (Afgan et al., 2016).  
183 Raw reads quality were checked with FastQC (v0.11.8) and the results were then aggregated with  
184 MultiQC (v1.9). For Arabidopsis, between 58.6 and 69.4 million 75 nt paired-end reads were  
185 sequenced with a mean phred score >30 for all bases. For Camelina, between 56.4 and 77.6 million  
186 75 nt paired-end reads were sequenced with a mean phred score >30 for all bases. In all samples,  
187 there were no overrepresented sequences and really few adapter (0.15% of adapter for the last bases  
188 of reads). Reads are aligned on the reference genome with STAR (v2.7.6a) using default parameters  
189 and quality again checked with MultiQC. Between 80% and 92.3% of reads were uniquely mapped  
190 for Arabidopsis samples and between 60.8% and 70.5% of reads were uniquely mapped for Camelina.  
191 Between 17 to 20% of reads mapped to multiple loci in Camelina because of the triplication event of

192 this genome. Reference genomes were *Camelina\_sativa.Cs.dna.release-49* and  
193 *Arabidopsis\_thaliana.TAIR10.49* from EnsemblPlant portal. Gene counts were obtained with  
194 featureCounts (v2.0.1). This option allows reads to map to multiple features for *Camelina*). 92.2% to  
195 93.3% of uniquely aligned reads were assigned to a gene for *Arabidopsis* and 80.7% to 88.6% aligned  
196 reads were assigned to a gene for *Camelina*. Differential gene expression was then analyzed with  
197 SARTools (v1.7.3) and the DESeq2 method (i.e., TuYV-infected plants vs. mock-inoculated, CaMV-  
198 infected plants vs. mock-inoculated). GO enrichment analysis was performed with Goseq (v1.36.0)  
199 on the DEGs.

200 To measure viral RNA loads in plants, the RNA-seq reads from each sample were mapped to the  
201 reference genome sequences of the host plant (*Arabidopsis* or *Camelina*) and the virus (CaMV or  
202 TuYV) with zero mismatches, and the mapped reads were sorted by polarity (forward, reverse and  
203 total) and counted. Viral read counts were then normalized per million of total (viral + non-viral) or  
204 plant reads (see Supplementary Dataset S1).

### 205 **Aphid feeding behavior**

206 To investigate the effects of TuYV and CaMV plant infections on the feeding behavior of *M. persicae*,  
207 we used the electrical penetration graph technique (EPG) (Tjallingii, 1988). Eight adult aphids were  
208 connected to a Giga-8 DC-system (EPG Systems, [www.epgsystems.eu](http://www.epgsystems.eu)) and placed on the leaf of an  
209 individual experimental host plant. To create electrical circuits that each included a plant and an  
210 aphid, we tethered each insect by attaching a 12.5  $\mu\text{m}$  diameter gold wire to the pronotum using  
211 conductive water-based silver glue. The whole system was set up inside a Faraday cage located in a  
212 climate-controlled room held at  $21 \pm 1$  °C and under constant LED illumination during recording.  
213 Plants were obtained as described in the previous section but, unlike the plants used for the RNA-seq  
214 experiment, the plants used in EPG were not pre-infested. We used the PROBE 3.5 software (EPG  
215 systems, [www.epgsystems.eu](http://www.epgsystems.eu)) to acquire and analyze the EPG waveforms as described (Tjallingii  
216 and Hogen Esch, 1993). Relevant EPG variables were calculated with EPG-Calc 6.1 software  
217 (Giordanengo, 2014). We chose variables based on five different EPG waveforms corresponding to:  
218 “probing duration”, “stylet pathway phase”, “phloem sap ingestion”, “time to first phloem sap  
219 ingestion” and “salivation in phloem sap”. For each aphid x plant x virus combination, we collected  
220 8-hour recordings from 20 to 23 individuals.

### 221 **Aphid fecundity**

222 To investigate the effects of TuYV and CaMV plant infections on the fecundity of *M. persicae*, we  
223 randomly selected synchronized wingless adults ( $8 \pm 1$  day-old) and transferred them onto  
224 experimental host plants. For *Arabidopsis* experiments, we used one plant per aphid, and we covered  
225 the pots with vented bread bags. For *Camelina* experiments, to force aphids to settle on symptomatic  
226 leaves, we placed adults on detached leaves that were laid on 1 % agarose in a Petri dish. The number  
227 of nymphs produced per adult was recorded after 5 days. We discarded from the analysis the adult  
228 aphids that died before the end of the experiment. Data on both *Arabidopsis* and *Camelina* host-plants  
229 were collected in three repetitions, comprising altogether 27-33 aphids per aphid x plant x virus  
230 combination.

### 231 **Statistical analyses of aphid behavior and fecundity**

232 Data on aphid feeding behavior were analyzed using generalized linear models (GLMs) with a  
233 likelihood ratio and the chi-square ( $\chi^2$ ) test. Since duration parameters (i.e. probing duration, stylet  
234 pathway phase, phloem sap ingestion and salivation) were not normally distributed, we carried out  
235 GLMs using a gamma (link = “inverse”) distribution. For the “time to first phloem phase”, we used  
236 the cox proportional hazards model and we treated cases where the given event did not occur as  
237 censored. The assumption of validity of proportional hazards was checked using the functions  
238 “coxph” and “cox.zph”, respectively (R package “survival”). For aphid fecundity, count data were  
239 not normally distributed. Accordingly, we carried out a GLM using a Poisson distribution, a quasi-  
240 likelihood function was used to correct for overdispersion, and Log was specified as the link function  
241 in the model. When a significant effect of one of the main factors was detected or when an interaction

242 between factors was significant, a pairwise comparison using estimated marginal means (R package  
243 “emmeans”) (p value adjustment with Tukey method) at the 0.05 significance level was used to test  
244 for differences between treatments. The fit of all GLMs was controlled by inspecting residuals and  
245 QQ plots. All statistical analyses were performed using R software v. 4.0.4 ([www.r- project.org/](http://www.r-project.org/)).  
246

247 **Results and discussion**

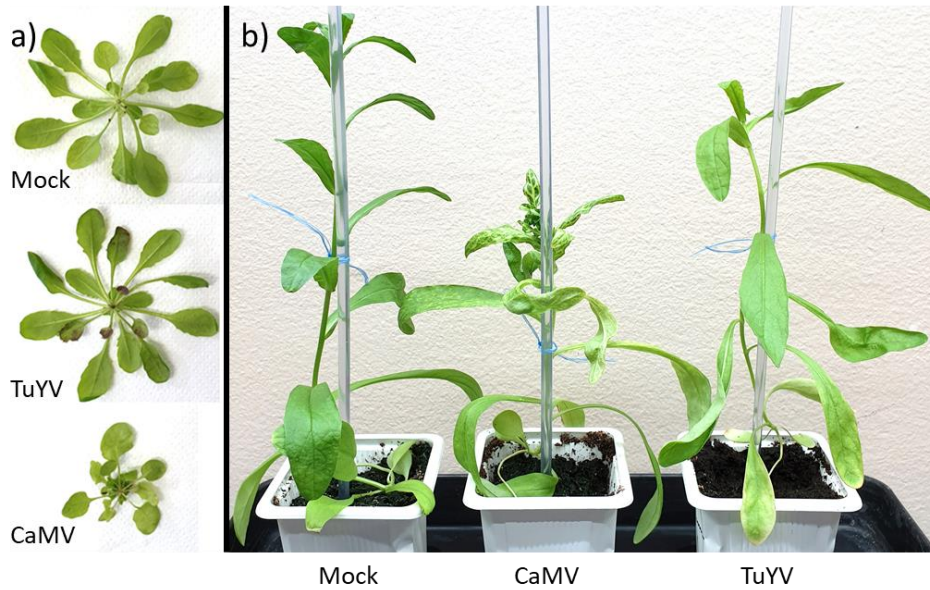

248  
249 Figure 1: Phenotype of CaMV and TuYV-infected plants. a) Arabidopsis and b) Camelina plants at 21 days after  
250 inoculation with the indicated virus or after mock inoculation.  
251

252 **Plant phenotype**

253 We used in this study 5-week-old Arabidopsis or Camelina plants that had been inoculated with  
254 CaMV or TuYV 3 weeks before analysis. In both Arabidopsis and Camelina plants, CaMV caused  
255 severe leaf curling, mosaic and vein chlorosis as well as dwarfism (Figure 1). TuYV-infected  
256 Arabidopsis and Camelina plants were smaller compared to mock-inoculated plants, but showed no  
257 leaf deformation or bleaching. Older TuYV-infected Arabidopsis leaves turned purple, probably due  
258 to stress-induced anthocyanin accumulation as previously reported for infection of Arabidopsis with  
259 another polerovirus, brassica yellows virus (Chen et al., 2018). The purple coloring was first visible  
260 on the abaxial leaf surface and progressed slowly until covering the entire leaf very late in infection.  
261 Old leaves of TuYV-infected Camelina displayed mild yellowing symptoms, primarily on the leaf  
262 border.

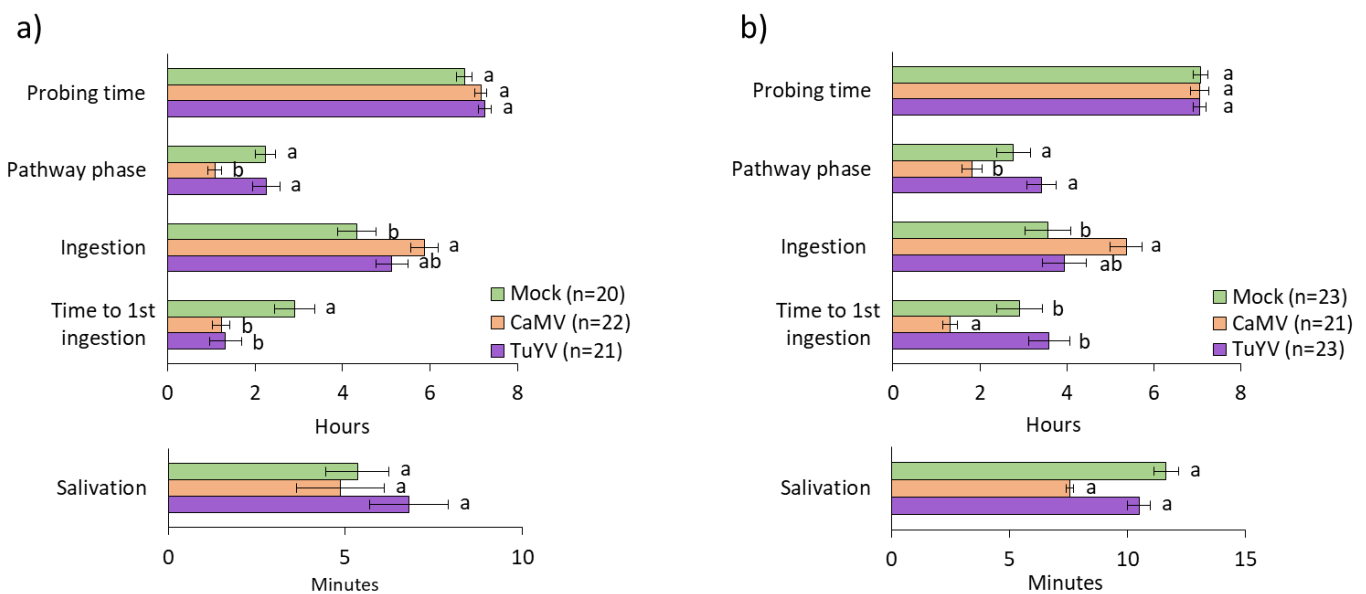

263  
264 Figure 2: Aphid feeding behavior parameters recorded by EPG on 5-week-old mock-inoculated, TuYV- or CaMV-  
265 infected a) Arabidopsis and b) Camelina. Different letters indicate significant differences between plants as tested by  
266 GLM followed by pairwise comparisons using “emmeans” ( $p < 0.05$ ; method: Tukey,  $n = 20-23$ ).



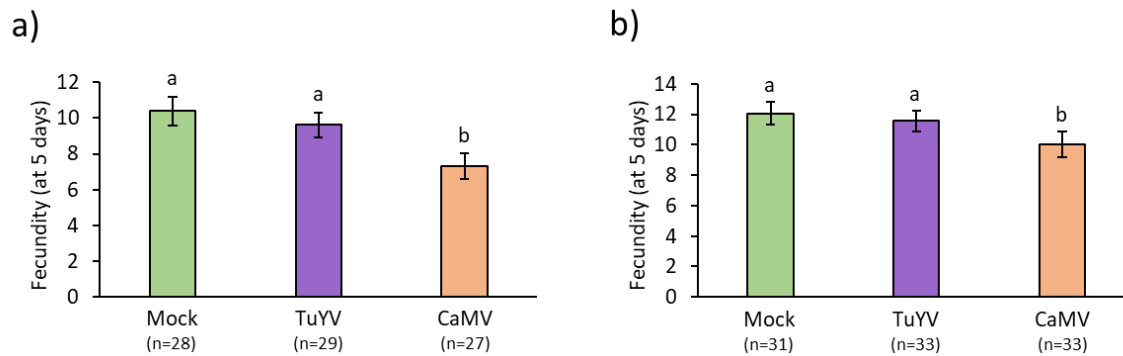

267

268

269

270

271

272

### **Aphid feeding behavior and fecundity**

273

274

275

276

277

278

279

We used EPG to compare aphid probing and feeding behavior on Arabidopsis and Camelina infected or not with CaMV or TuYV (Figure 2a,b). The total probing time was identical for all six conditions and the aphids were active for approximately seven hours during the eight hours observation period. The pathway phase and the time until the first phloem ingestion were in general longer on Camelina for all three conditions, whereas the ingestion phase was longer on Arabidopsis. The most important difference was the salivation time, which was extended on Camelina (50-100 % longer than on Arabidopsis), independently of the infection status.

280

281

282

283

284

285

286

287

288

289

CaMV infection changed aphid behavior similarly on both plant hosts. The pathway phase and the time to first phloem ingestion were decreased, whereas phloem ingestion was increased. Salivation time was not affected by the infection status of the two-plant species. Infection with TuYV had no major effect. The only significantly affected behavioral parameter was the time until first phloem ingestion, which was reduced by half on TuYV-infected Arabidopsis but not on TuYV-infected Camelina, compared to mock-inoculated plants. This is in contrast with CaMV infection for which the time to first phloem sap ingestion was reduced on both hosts. Previous EPG experiments on Arabidopsis (Bogaert et al., 2020) and Camelina (Chesnais et al., 2019a) have reported neutral to slightly positive effects of TuYV infection on aphid probing and feeding behavior, and highlighted also host-specific viral effects on plant quality and vector behavior (Chesnais et al., 2019b).

290

291

292

293

294

295

296

297

298

Taken together, the significantly reduced time until first phloem ingestion observed on infected Arabidopsis might contribute to a better acquisition of CaMV and TuYV. The other transmission-related feeding parameters were only marginally modified on TuYV-infected plants, whereas CaMV infection altered aphid feeding more strongly. The reduced pathway phase and the increased phloem ingestion might also facilitate CaMV acquisition from phloem tissues. These alterations are expected to be detrimental for non-circulative viruses (such as the non-persistent potyviruses) that are acquired during intracellular penetrations occurring in the pathway phase, but lost if the aphid stylets reach the phloem sap (Kloth and Kormelink, 2020). However, this does not apply to CaMV, acquired efficiently from phloem sap as well as mesophyll and epidermis cells (Palacios et al., 2002).

299

300

301

302

303

304

Infection with CaMV reduced aphid fecundity significantly on both plant host species (Figure 3a,b), compared to mock-inoculated plants (GLM,  $\chi^2 = 0.0007$  and  $\chi^2 = 0.0409$  for Arabidopsis and Camelina, respectively) and correlated with the strong symptoms of infected plants. Fecundity was unchanged on TuYV-infected Arabidopsis and Camelina. This indicated that the severe (but less strong, compared to CaMV infection) phenotype of TuYV-infected Camelina did not interfere with aphid fecundity.

305

306 **Quality of RNA and sequence alignment data**

307 Roughly 29-35 million reads were obtained for Arabidopsis mRNA-seq datasets, of which >80 %  
308 could be aligned for mock-inoculated and TuYV-infected samples and 80 % for CaMV-infected  
309 samples (Supplementary Table S2). For Camelina, 28-38million reads were obtained and 61-71 % of  
310 the reads could be aligned (Supplementary Table S2). Principal component analysis of RNA-seq  
311 libraries (Figure 4a,b) indicated for both plant species that the three biological replicates per condition  
312 clustered well together and that the different conditions (mock-inoculated or infected with either  
313 virus) were well separated. Thus, the reads were of excellent quality and suited for a transcriptome  
314 analysis.

315 For 8 selected Arabidopsis genes, the trends of gene deregulations detected in the transcriptome  
316 data could be reproduced by an alternative analysis method, RT-qPCR (Supplementary Figure S1  
317 RT-qPCR). All 8 genes followed the same trend using either method for CaMV-infected Arabidopsis,  
318 and all except two (*At\_AOS* and *At\_EDS5*) for TuYV-infected Arabidopsis. The discrepancies were  
319 probably due to the rather weak expression changes, which are sometimes difficult to detect by RT-  
320 qPCR due to its intrinsic exponential amplification kinetics.

321 Quantification of viral RNA loads by counting viral reads normalized per million of total plant  
322 reads in each sample revealed that CaMV pregenomic (pg)RNA and TuYV genomic (g)RNA (both  
323 represented by forward reads; Supplementary Dataset S1) accumulated to comparable levels in each  
324 of the three biological replicates, with the exception of one of the three TuYV-Arabidopsis replicates  
325 which showed a lower number of normalized viral reads. The data confirmed further that the mock-  
326 inoculated plants were not cross-contaminated. Note that, because TuYV gRNA is not polyadenylated  
327 (unlike CaMV pgRNA) the poly(A) enrichment step of Illumina library preparation protocol should  
328 have led to its depletion. This might explain the greater variation in relative abundance of TuYV reads  
329 between biological replicates, compared to CaMV reads. Despite this high variability, a lower virus  
330 load was observed in TuYV-infected Arabidopsis compared to TuYV-infected Camelina plants  
331 (Supplementary Dataset S1). Notably, CaMV loads in Arabidopsis were also lower than those in  
332 Camelina (ca. 1.5 times; Supplementary Dataset S1). This indicates that despite drastic differences in  
333 disease symptoms between CaMV (severe symptoms) and TuYV (mild symptoms) in both  
334 Arabidopsis and Camelina, Camelina appears to be more conducive for replication of both viruses  
335 than Arabidopsis.

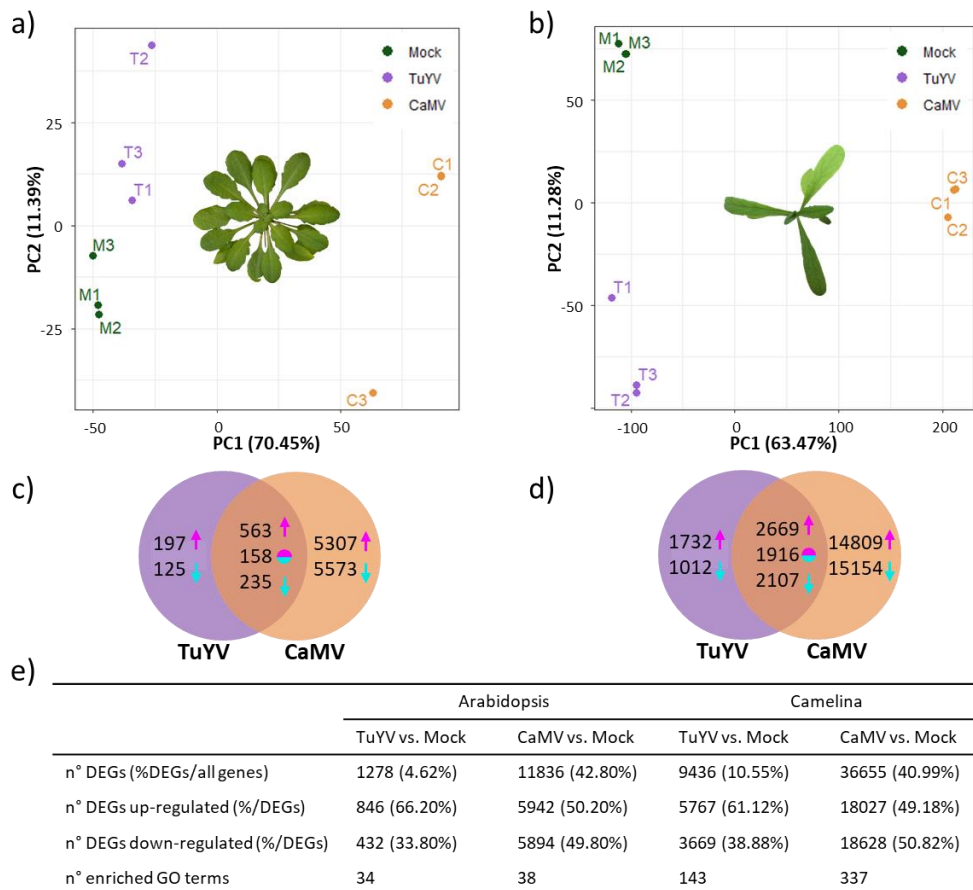

336

337

338

339

340

341

342

343

344

### CaMV modifies expression of far more genes than TuYV

345

346

347

348

349

350

351

352

Then we determined the number of differentially expressed genes (DEG) in infected hosts (Figure 4c-e). Far more DEGs were detected in Camelina than in Arabidopsis. This was in part due to its allohexaploid genome consisting of three Arabidopsis-like genomes coding for almost 90,000 genes (Kagale et al., 2014), compared to Arabidopsis's diploid genome containing about 28,000 coding genes ([http://ensembl.gamene.org/Arabidopsis\\_thaliana/Info/Annotation/#assembly](http://ensembl.gamene.org/Arabidopsis_thaliana/Info/Annotation/#assembly), last accessed 17 December 2021). This means that for many Arabidopsis genes there are three orthologous Camelina genes. Also, the higher accumulation of both viruses in this host might contribute to the higher counts.

353

354

355

356

357

358

359

360

In Arabidopsis, CaMV modified expression of ~11,800 genes significantly ( $P_{(adj)} < 0.05$ ), whereas TuYV modified expression of ~1,300 genes, corresponding to 43 % and 5 % of the total genes, respectively (Figure 4e). In CaMV-infected Camelina, we detected ~36,700 DEGs, and in TuYV-infected Camelina ~9,400 DEGs, corresponding to 41 % and 11 % of all genes, respectively. Thus, the impact of CaMV infection on gene deregulation was much more pronounced when compared to TuYV infection, in accordance with the phenotype of infected plants (Figure 1). The lower numbers of DEGs for TuYV in both hosts could be at least partially due to its restriction to phloem tissues, unlike CaMV which infects all cell types.

361

362

363

CaMV modified expression of ~40 % of the total genes independently of the host plant, whereas the proportion of TuYV-induced DEGs was host-dependent and two times higher in infected Camelina compared to Arabidopsis (11 % vs. 5 %). This is in line with the relative loads of viral RNA

364 (Supplementary Dataset S1), indicating that Camelina is more susceptible to TuYV infection than  
 365 Arabidopsis (3 times more TuYV RNA accumulation in Camelina compared to Arabidopsis), while  
 366 CaMV accumulates in both hosts at comparable levels (only 1.5-fold difference in average viral RNA  
 367 loads between Arabidopsis and Camelina).

368 956 DEGs, corresponding to 3.4 % of the genome, were common for both viruses in Arabidopsis.  
 369 The proportion of common DEGs rose to 7.5 % (~6,700 genes) in infected Camelina. Since CaMV  
 370 and TuYV are viruses with entirely different replication mechanisms, mediated by respectively viral  
 371 reverse transcriptase and viral RNA-dependent RNA polymerase, these common host genes might be  
 372 involved in general stress responses and/or are constituents of the core defense mechanisms. A GO  
 373 analysis indicated that this was true for Arabidopsis with GO terms related to stress and transport in  
 374 common for both infections, whereas for Camelina rather ribosome and replication-related genes  
 375 were enriched (Supplementary Figure S2).

376 The proportions of up- and down-regulated genes were similar for a given virus in the two hosts  
 377 (Figure 4e). However, when comparing the two viruses, the proportion of down-regulated genes was  
 378 higher in CaMV-infected plants (about 50 % in CaMV-infected Arabidopsis and Camelina) than in  
 379 TuYV-infected plants (34 % in TuYV-infected Arabidopsis 39 % in TuYV-infected Camelina). Thus,  
 380 there was a correlation between the proportion of down-regulated genes and symptom severity. The  
 381 milder disease symptoms of TuYV infection coincided in both hosts with the lower proportion of  
 382 down-regulated genes, while the ability of CaMV to downregulate a higher proportion of genes  
 383 coincided with the more severe disease symptoms. The latter ability might reflect CaMV activities in  
 384 both cytoplasm (viral mRNA translation and pgRNA reverse transcription) and nucleus [viral dsDNA  
 385 repair followed by pgRNA transcription and export assisted by nuclear-imported viral proteins P4,  
 386 P5 and likely P6 (Haas et al., 2008; Kubina et al., 2021)].

### 387 Impact of CaMV and TuYV infection on plant hosts: Gene ontology analysis

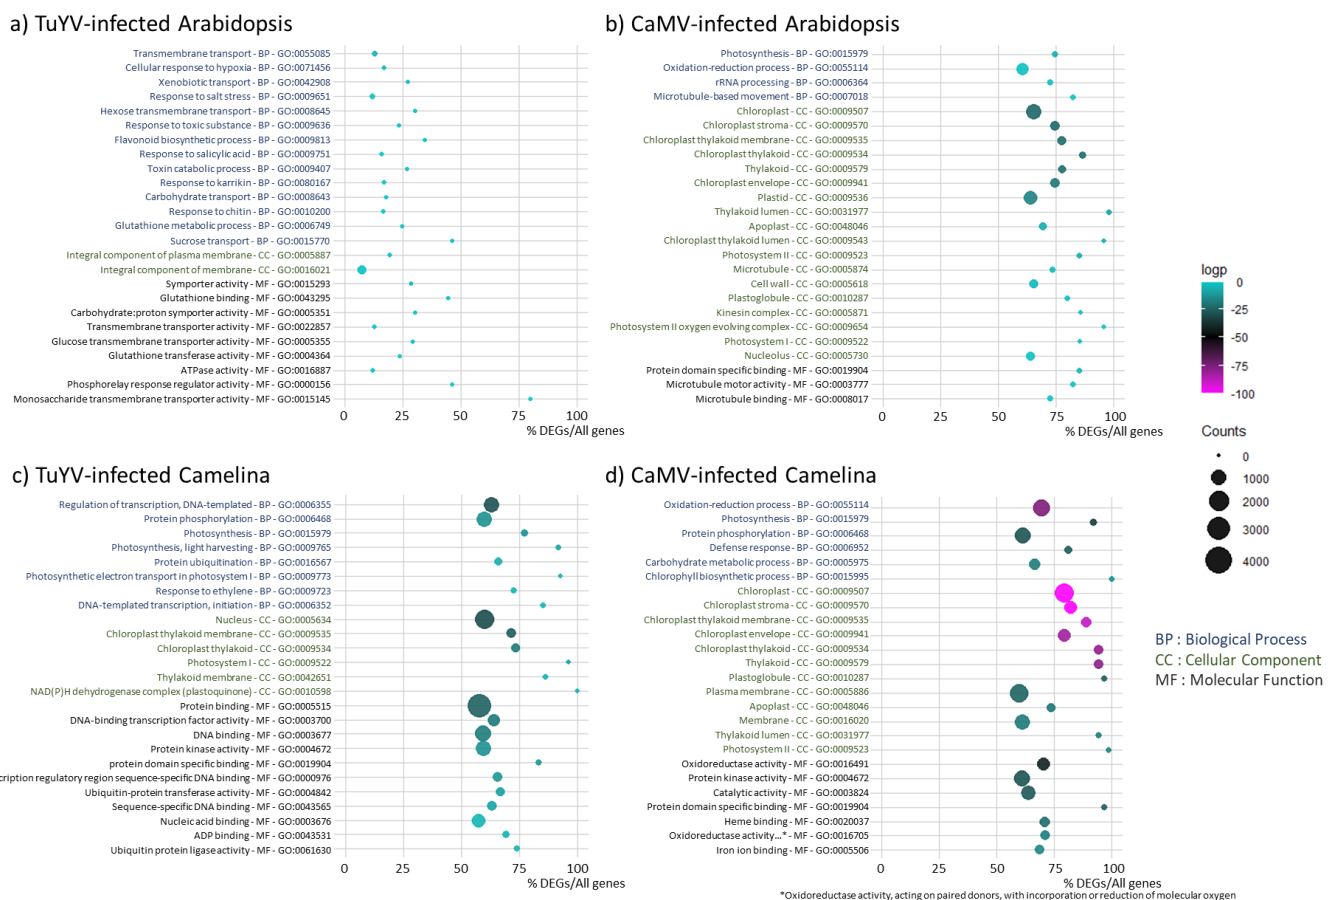

388  
 389 Figure 5: Gene ontology (GO) analysis showing the Top 25 GO of deregulated processes in TuYV- and CaMV-infected  
 390 Arabidopsis and Camelina. a) TuYV-infected vs. mock-inoculated Arabidopsis, b) CaMV-infected vs. mock-inoculated  
 391 Arabidopsis, c) TuYV-infected vs. mock-inoculated Camelina and d) CaMV-infected vs. mock-inoculated Camelina. GO

392 IDs and corresponding GO terms are specified in the vertical axis. For each category (BP: Biological Process, CC: Cellular  
393 Component and MF: Molecular Function), GOs are sorted according to increasing log<sub>2</sub> p-values, also indicated by the  
394 color of each spot (magenta representing the most significant p-values, see color scale bar), in order to place the most  
395 significantly enriched GOs on top of the graph. The absolute number of DEGs that matched the GO term is indicated by  
396 the size of each spot, whereas the horizontal axis shows the ratio of DEGs vs. all genes belonging to the GO term.

397 To identify the most prominent processes affected in aphid-infested CaMV and TuYV-infected  
398 Arabidopsis and Camelina, we carried out a Gene Ontology (GO) analysis (Figure 5). In general,  
399 TuYV-induced GO changes were much less pronounced (considering the percentage of DEGs in each  
400 category and the DEG counts) compared to CaMV, reflecting the low absolute numbers of DEGs in  
401 TuYV-infected plants and the weaker impact of TuYV on plant phenotype. Remarkably, in the Top  
402 25 categories, only about 25 % of genes per GO were deregulated in TuYV-infected Arabidopsis  
403 (Figure 5a), whereas this value increased to more than 50 % in TuYV-infected Camelina (Figure 5c).  
404 Again, this may indicate that TuYV infection had a stronger effect on gene regulation in Camelina  
405 than in Arabidopsis. A different situation was found for CaMV, where the percentages of DEGs per  
406 GO were similar in both hosts, and always above 50 % of genes per GO, indicating similarly strong  
407 interactions with either host plant.

408 Then we looked closer at the different categories. Interestingly, in CaMV-infected Arabidopsis  
409 (Figure 5b), the majority of the enriched GO-terms was related to photosynthesis/chloroplast in both  
410 BP and CC categories, which might explain leaf chlorosis (loss of chlorophyll and/or chloroplasts).  
411 The next most affected biological process was oxidation-reduction that might be related to stress  
412 response. Also GO-terms related to microtubule-based movement appeared in the BP and CC lists,  
413 as well as apoplast, cell wall, kinesin complex and nucleolus which may be linked to virus or viral  
414 RNP intracellular trafficking. Taken together, CaMV infection mostly modified photosynthesis,  
415 oxidation-reduction processes and microtubule-related processes.

416 GO analysis of CaMV-infected Camelina indicated a similar pattern (Figure 5d). Again, several  
417 GO-terms related to photosynthesis/chloroplast and oxidation/reduction were enriched in both BP  
418 and CC categories. It is worth mentioning that for CaMV infection of Camelina, GO analysis showed  
419 enrichment of genes in the GO Defense Response (BP – GO:0006952), which was absent in the Top  
420 25 list of CaMV-infected Arabidopsis. Other BP-related enriched GOs were protein phosphorylation  
421 and carbohydrate metabolism. As in Arabidopsis, apoplast changes were significant. On the other  
422 side, neither cell wall nor microtubule processes were present among the Top 25 deregulated  
423 processes in Camelina. Concerning the main categories of molecular functions, oxidation-reduction  
424 and protein domain specific binding dominated this category.

425 In contrast to CaMV, TuYV infection of Arabidopsis had no impact on photosynthesis-related GO  
426 terms. In both BP and MF, the most significantly enriched GO-terms were found in transport,  
427 especially carbohydrate transport. In addition, some defense and stress responses (xenobiotics, chitin,  
428 salt) and glutathione metabolism – indicative of oxidative stress – were affected. Flavonoid synthesis  
429 was significantly deregulated, in line with the purple-colored leaves of TuYV-infected Arabidopsis  
430 (Figure 1). In accordance with the modifications in sucrose transport, the most prominent category in  
431 CC comprised membranes. The Top 25 GO-terms in TuYV-infected Camelina were different from  
432 those in TuYV-infected Arabidopsis. As in CaMV infection, DEGs in photosynthesis and related  
433 processes dominated the Top 25 GO in TuYV-infected Camelina in BP and CC and were likely  
434 related to the mild yellowing symptoms appearing on old leaves. Next were DNA-related processes  
435 in both BP and MF categories, probably linked to transcriptional regulations of host genes in response  
436 to viral infection. In CC, the GO-term nucleus was deregulated, again in favor of a strong effect of  
437 TuYV on transcriptional regulation in infected Camelina. Other deregulated processes included  
438 ubiquitination, which appeared in several categories in BP and MF. On the other hand, oxidation-  
439 reduction did not appear under the top 25 GO except as plastoquinone, which represents a significant  
440 difference between CaMV and TuYV infections of Arabidopsis.

#### 441 **Impact of CaMV and TuYV infection on plant hosts: Heatmap analyses**

442 To better characterize the impact of viral infection on aphid-infested plants, we established the lists  
443 (Supplementary Dataset S2) and corresponding heatmaps (Figures 6-10) of DEGs for selected

444 categories. Note that if not otherwise indicated, information on gene function is from the TAIR site  
445 (<https://www.arabidopsis.org/>). For mapping of Arabidopsis and Camelina genes in the heatmaps, we  
446 used the syntelog matrix (Kagale et al., 2014). This matrix assorts each individual Arabidopsis gene  
447 to the corresponding triplet of Camelina homologues. 62,277 Camelina genes out of 89,418 are  
448 syntenically orthologues (syntelogs) to Arabidopsis genes, among which some are considered  
449 ‘fractionated’ (if one or two of the homologues were lost). This explains why for certain Arabidopsis  
450 genes, only one or two homologues Camelina genes are presented.

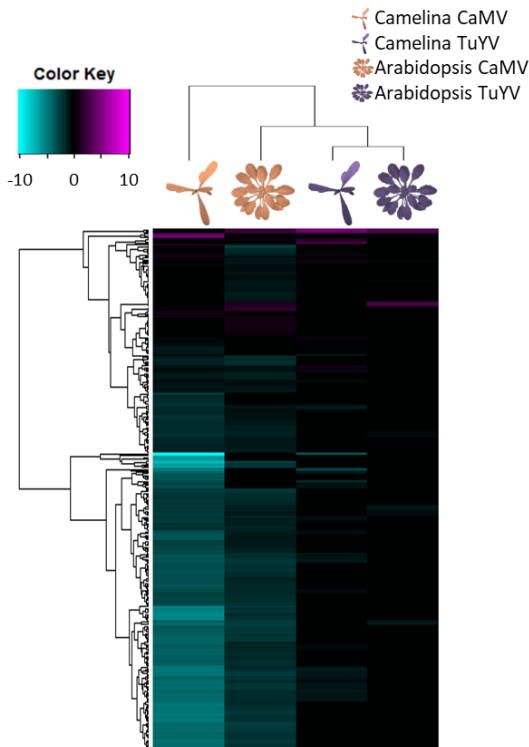

451  
452 Figure 6. Hierarchical clustering of differentially expressed genes (DEGs) related to photosynthesis (GO:0015979) in  
453 CaMV- and TuYV-infected Arabidopsis and Camelina compared to their mock-inoculated control plants (Supplementary  
454 Dataset S2). The color key scale displays the log<sub>2</sub>fold changes from -10 to +10 as a gradient from cyan to magenta.

455 CaMV and TuYV infection downregulated photosynthesis-related genes in infested Arabidopsis  
456 and Camelina (Figure 6). Overall downregulation of photosynthesis-related genes was much more  
457 pronounced in CaMV-infected than in TuYV-infected plants. Interestingly, both viruses interacted  
458 more strongly with Camelina photosynthesis than with Arabidopsis photosynthesis. No  
459 photosynthesis-related gene was similarly deregulated in all four conditions. The most downregulated  
460 photosynthesis gene in CaMV-infected Camelina was *PORA* (Camelina Csa02g051950,  
461 Csa11g086170 and Csa18g025480, corresponding to Arabidopsis AT5G54190), coding for a protein  
462 involved in chlorophyll biosynthesis, but also in response to ethylene. *PORA* expression was also  
463 inhibited in TuYV-infected Camelina. Expression of the Arabidopsis orthologue, however, was not  
464 modified by any of the two viruses. This might indicate that downregulation of *PORA* is a plant-  
465 specific and not a virus-specific response. The most downregulated gene in CaMV-infected  
466 Arabidopsis, AT3G27690, encoding the protein LHCb2.4, a component of the light harvesting  
467 complex, was also strongly repressed in Camelina infected by CaMV. Expression of this gene  
468 was also affected in TuYV-infected Arabidopsis but to a lesser extent and expression was not modified in  
469 TuYV-infected Camelina. Some genes were upregulated by infection. This was notably the case for  
470 the glucose-6-phosphate/phosphate transporter 2 (AT1G61800), which is involved in regulation of  
471 photosynthesis and which was upregulated in three of the four conditions (no gene expression  
472 modification in CaMV-infected Camelina). In CaMV-infected Camelina, a chloroplastic ferritin  
473 (AT3G11050) was the most upregulated photosynthesis gene. Ferritins are iron-binding proteins and  
474 are supposed to be involved in responses against oxidative stress in Arabidopsis (Briat et al., 2010),  
475 which could explain its overexpression.

476 Taken together, virus infection strongly interfered with photosynthesis. This might explain the leaf  
 477 yellowing observed clearly on CaMV-infected plants and to a lesser extent on TuYV-infected  
 478 Camelina. Leaf yellowing, probably due to reduced chlorophyll content in chloroplasts and/or to a  
 479 reduced number of photosynthesizing chloroplasts caused by the gene deregulations (Chen et al.,  
 480 2002), can alter settling preference of aphids (A'Brook, 1973; Fennell et al., 2020). However, this  
 481 was not confirmed by previous observations on TuYV-infected and CaMV infected Camelina plants  
 482 (Chesnais et al., 2019a). Indeed, although Chesnais and coworkers reported that *M. persicae* aphids  
 483 preferred to settle on TuYV-infected Camelina, compared to healthy plants, no such aphid preference  
 484 was observed for CaMV-infected Camelina, despite the strong yellowing symptoms. This suggests  
 485 that aphid preference for a plant is not only driven by visual aspects.

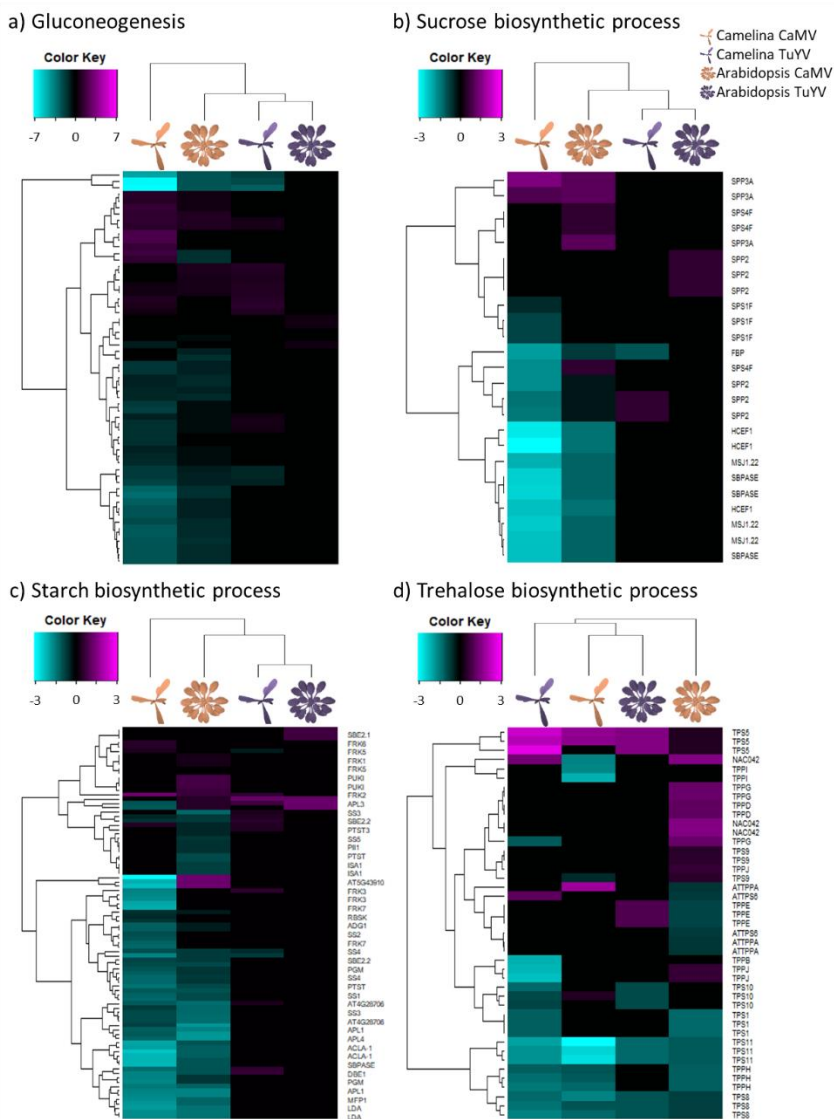

486  
 487 Figure 7. Hierarchical clustering of differentially expressed genes (DEGs) related to a) gluconeogenesis (GO:0006094),  
 488 b) sucrose biosynthetic process (GO:0005986), c) starch biosynthetic process (GO:0019252) and d) trehalose biosynthetic  
 489 process (GO:0005992) in CaMV- and TuYV-infected Arabidopsis and Camelina compared to mock-inoculated controls  
 490 (Supplementary Dataset S2). The color key scales display the log<sub>2</sub>fold changes as color gradients from cyan to magenta.

491 In line with the repression of photosynthesis, expression of many sucrose synthesis and  
 492 gluconeogenesis-related genes was reduced by CaMV infection (Figure 7a,b). The effect of CaMV  
 493 was stronger in Camelina than in Arabidopsis. In TuYV-infected Camelina, the amplitude of the gene  
 494 deregulation was smaller, compared to CaMV-infected Camelina, but the proportions of up- and  
 495 down-regulated genes were comparable. In TuYV-infected Arabidopsis, expression changes were  
 496 even smaller than in TuYV-infected Camelina. For both TuYV- and CaMV-infected plants, among  
 497 the most down-regulated genes were those coding for key enzymes in sucrose synthesis, in particular

498 *HCEF1* (AT3G54050) and *FBP* (AT1G43670). Interestingly, the sucrose phosphatase *SPP1*  
 499 (AT1G51420) was strongly upregulated by CaMV infection, but downregulated in TuYV-infected  
 500 plants. Remarkably, the most down-regulated gene in gluconeogenesis was the aldolase *FBA5*  
 501 (AT4G26530) and this in all four conditions tested. In line with the stronger suppression of  
 502 gluconeogenesis and sucrose synthesis-related genes by CaMV infection, many starch synthesis-  
 503 related genes were also repressed by CaMV (but not TuYV) infection (Figure 7c). An exception was  
 504 *DBE1* (Csa17g005380, Csa14g004380 and Csa03g004400, syntelogs of AT1G03310) encoding a  
 505 starch branching enzyme was upregulated in TuYV-infected Camelina, which is consistent with a  
 506 recent study showing that TuYV-infection tends to increase the carbohydrate concentrations in  
 507 Camelina leaves (Chesnais et al., 2019b).

508 The effect of infection and infestation on trehalose metabolism was different from that on glucose,  
 509 starch and sucrose metabolism (Figure 7d). Contrary to downregulation of the latter carbohydrate  
 510 pathways only in CaMV-infected plants, trehalose-related genes were downregulated in both TuYV-  
 511 and CaMV-infected Arabidopsis and Camelina. Upregulated genes in this pathway were also  
 512 observed, in particular in CaMV-infected Arabidopsis. Trehalose is induced by *M. persicae*  
 513 infestation and has been shown to contribute to defenses against aphids (Hodge et al., 2013; Singh et  
 514 al., 2011; Singh and Shah, 2012). Especially *TPS11* (Trehalose Phosphate Synthase 11) has been  
 515 implicated in mounting defenses against aphids (Singh et al., 2011), by promoting starch synthesis,  
 516 but also by activating the phytoalexin-deficient gene, *PAD4*. Starch is a feeding-deterrent to aphids  
 517 (Campbell et al., 1986) and elevated starch levels are correlated with reduced aphid performance  
 518 (Singh et al., 2011). Interestingly, *TPS11* but also *TPS8* were significantly down-regulated in all  
 519 virus-infected plants, suggesting that viral infection might favor aphid infestation. On the other hand,  
 520 other TPS isoforms were not modified in the same way, for example the *TPS5* (AT4G17770) was  
 521 upregulated in all four conditions tested. This suggests a more complex regulation of this pathway by  
 522 viral infection and aphid infestation.

523 We also analyzed expression of genes involved in amino acid metabolism, because they represent  
 524 the most important nutrient for aphids. Probably due to the multiple functions of these genes, no  
 525 clear pattern was detected (Supplementary Figure S3).

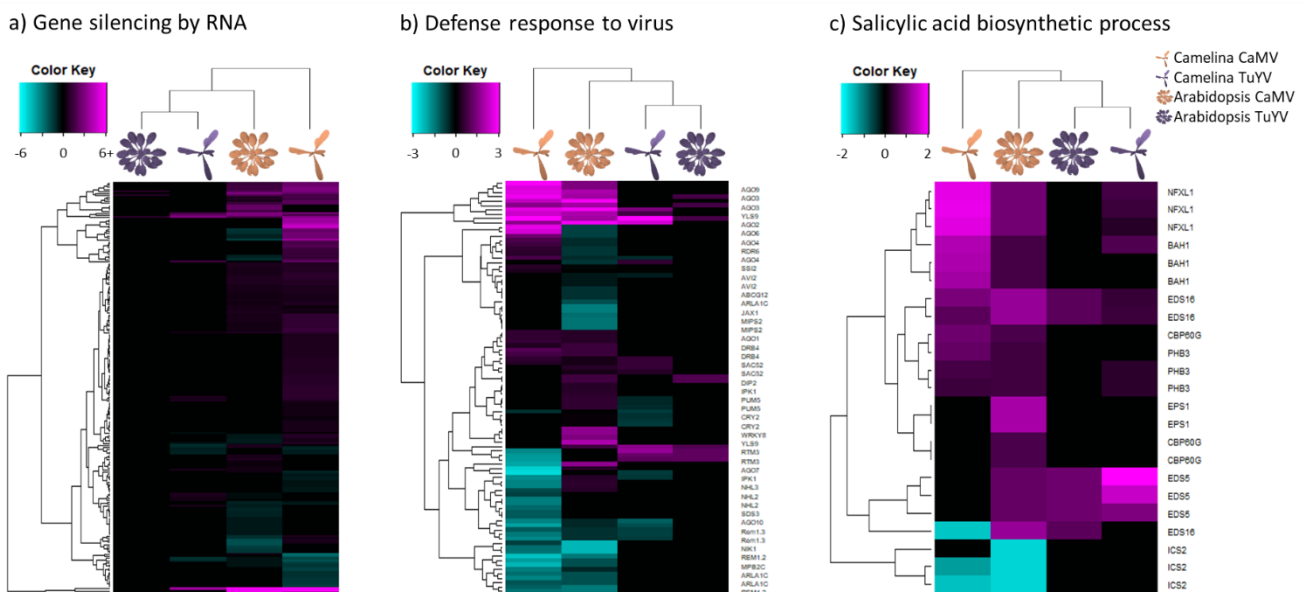

526  
 527 Figure 8. Hierarchical clustering of differentially expressed genes (DEGs) related to a) production of siRNA involved in  
 528 RNA interference and Gene silencing by RNA (GO:0030422 and GO:0031047), b) defense response to virus  
 529 (GO:0051607) and c) salicylic acid biosynthetic process (GO:0009697) in CaMV- and TuYV-infected Arabidopsis and  
 530 Camelina compared to their mock-inoculated controls (Supplementary Dataset S2). The color key scales display the  
 531 log<sub>2</sub>fold changes as gradients from cyan to magenta.

532  
 533 When looking at global virus defense-related genes, the effects on their regulation were more  
 534 virus-specific than host-specific. In agreement with previous findings in CaMV-infected Arabidopsis



535 (Shivaprasad et al., 2008), many RNA silencing-related genes were found to be upregulated by CaMV  
536 not only in Arabidopsis but also in Camelina (Figure 8a). Among them, most notable are components  
537 of the 21 nt siRNA-directed gene silencing pathways such as Double-stranded RNA-binding protein  
538 4 (DRB4), a partner of the antiviral Dicer-like protein 4 (DCL4) generating 21 nt siRNAs, and siRNA-  
539 binding effector proteins Argonaute 1 (AGO1; AT1G48410), AGO2 (AT1G31280) and AGO3  
540 (AT1G31290). Notably, AGO2, also known to be involved in defense against RNA viruses  
541 (Carbonell and Carrington, 2015), was up-regulated in TuYV-infected Camelina (but not in TuYV-  
542 infected Arabidopsis), while AGO3 – the Argonaute protein most closely related to AGO2 and also  
543 showing antiviral activity *in vitro* (Schuck et al., 2013) – was up-regulated in response to TuYV  
544 infection in both hosts. This suggests redundant (and compensatory) roles of AGO2 and AGO3 in  
545 defenses against both RNA and DNA viruses. DCL4 itself (AT5G20320) and DCL2 (AT3G03300),  
546 generating 22 nt siRNAs and acting together with DCL4 in defenses against RNA and DNA viruses  
547 (Blevins et al., 2006), were respectively weakly (one of three isoforms of Camelina DCL4) and  
548 strongly upregulated (DCL2) in CaMV-infected Camelina but not in the other virus-host  
549 combinations where their levels were likely sufficiently high to cope with both viruses. Interestingly,  
550 AGO10 that counteracts AGO1 in the miRNA-directed silencing pathways regulating plant  
551 development and physiology (Yu et al., 2017) was downregulated by CaMV (but not TuYV) infection  
552 in both Arabidopsis and Camelina. RNA-directed RNA polymerase 6 (RDR6) generating miRNA-  
553 dependent secondary 21-nt siRNAs was upregulated by TuYV infection in Camelina and down-  
554 regulated by CaMV infection in Arabidopsis, while remaining non-responsive in the other virus-host  
555 combinations. Components of the nuclear silencing and 24 nt siRNA-directed DNA methylation  
556 pathways such as AGO4 (AT2G27040), AGO6 (AT2G32940) and AGO9 (AT5G21150) were  
557 upregulated in Camelina by CaMV (but not TuYV), while AGO4 and AGO6 were down-regulated  
558 and AGO9 up-regulated in CaMV-infected Arabidopsis, denoting virus- and plant-specific gene  
559 deregulations. Interestingly, the most upregulated gene in the RNA silencing category was  
560 AT5G59390. It was strongly upregulated in CaMV-infected Camelina and Arabidopsis, less strongly  
561 upregulated in TuYV-infected Camelina and not significantly deregulated in TuYV-infected  
562 Arabidopsis. This gene codes for a XH/XS domain-containing protein, which probably functions in  
563 siRNA-directed DNA methylation and might contribute to methylation and transcriptional silencing  
564 of CaMV dsDNA in the nucleus (Omae et al., 2020). Taken together, CaMV infection strongly  
565 affected silencing-related genes in both hosts, but the deregulations were host-specific, with down-  
566 regulations dominating in Arabidopsis, and upregulations in Camelina. Transcription of RNA  
567 silencing genes was much less affected in TuYV-infected plants.

568 Among components of other defense pathways (Figure 8b), the hairpin-induced protein *hin1*  
569 (AT2G35980, also referred to as YLS9 and reported to be induced by cucumber mosaic virus  
570 infection) was strongly induced during CaMV infection, while *Rem 1.2* (AT3G61260, also referred  
571 to as REMORIN and known to negatively regulate cell-to-cell movement of the potyvirus TuMV via  
572 competition with PCaP1 for binding actin filaments (Cheng et al., 2020) was strongly down-regulated  
573 during CaMV infection. None of these genes (*hin1* and *Rem1.2*) were deregulated by TuYV-infection.  
574 However, another REMORIN, *Rem1.3* (known to impair potato virus X movement (Raffaele et al.,  
575 2009)) was down-regulated during TuYV infection in Camelina and during CaMV infection in both  
576 Arabidopsis and Camelina. On the other hand, the gene for myo-inositol-phosphate synthase 2  
577 (*MIPS2*, AT2G22240) was downregulated in all conditions and *RTM3* [AT3G58350, known to block  
578 phloem movement of potyviruses, (Cosson et al., 2010)] was upregulated in TuYV- and  
579 downregulated in CaMV-infected hosts. It is therefore conceivable that remorins and MIPS2 are  
580 factors controlling TuYV and CaMV movement. Curiously, the gene *NIK1* (AT5G16000, NSP-  
581 interacting kinase), which encodes a receptor-like kinase, involved in innate immunity-based defense  
582 response against a ssDNA geminivirus, was strongly down-regulated in CaMV-infected but not in  
583 TuYV-infected host plants. Considering that downregulation of *NIK1* should activate protein  
584 translation and could promote accumulation of viral proteins (Zorzatto et al., 2015), it could have a  
585 proviral effect during CaMV infection.

586 Next, we looked at salicylic acid (SA) synthesis as this phytohormone is related to innate  
 587 immunity-based defense responses against non-viral and viral pathogens including CaMV (Zvereva  
 588 et al., 2016; Zvereva and Pooggin, 2012). Here, most genes were induced in both hosts and for both  
 589 viruses (Figure 8c), with the notable exception of *ICS2* (AT1G18870), which was downregulated in  
 590 CaMV infection and slightly upregulated in TuYV infection, while its redundant orthologue *ICS1*  
 591 (AT1G74710) was slightly but significantly downregulated only in CaMV-infected Arabidopsis.  
 592 Overall, genes involved in virus defense and SA biosynthesis were more strongly induced by CaMV-  
 593 infection than TuYV-infection, whatever the host-plant, indicating a stronger pathogenicity of CaMV.  
 594 The overexpression of SA-related genes in CaMV-infected plants could also reflect the ability of  
 595 CaMV effector protein P6 to suppress SA-dependent autophagy, which might lead to compensatory  
 596 feedback up-regulation of SA genes (Zvereva et al., 2016). Deregulation of genes implicated in the  
 597 SA pathway might have consequences on insect-plant interactions. In particular increased SA could  
 598 have a beneficial effect on aphid vector and possibly transmission, because it can be concomitant  
 599 with decreased JA levels and consequently with decreased plant defenses against aphids (Kloth et al.,  
 600 2016; Lu et al., 2020).  
 601

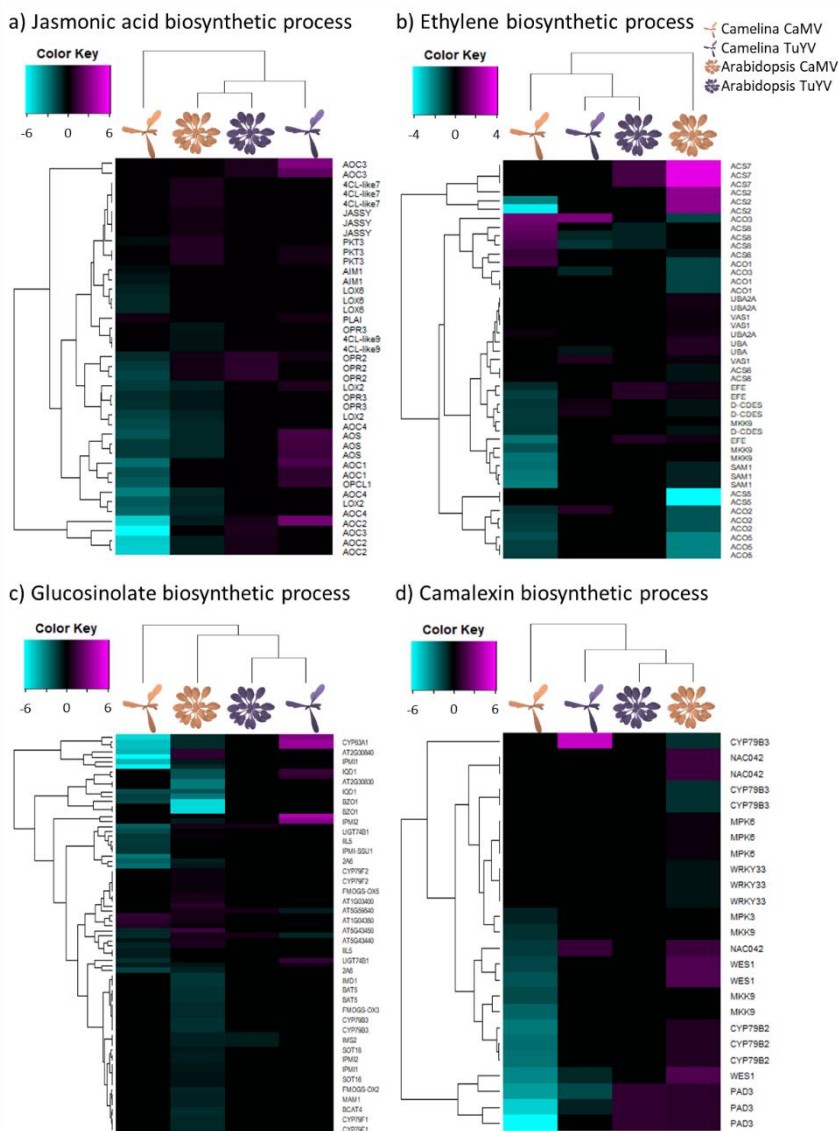

602  
 603 Figure 9. Hierarchical clustering of differentially expressed genes (DEGs) related to a) jasmonic acid biosynthetic process  
 604 (GO:0009695), b) ethylene biosynthetic process (GO:0009693), c) glucosinolate biosynthetic process (GO:0019761) and  
 605 d) camalexin biosynthetic process (GO:0010120) in CaMV- and TuYV-infected Arabidopsis and Camelina compared to  
 606 mock-inoculated controls (Supplementary Dataset S2). The color key scales display the log<sub>2</sub>fold changes as gradients  
 607 from cyan to magenta.  
 608

609 Next, we analyzed different metabolic pathways to determine if CaMV and TuYV infections  
610 modulate other hormones and secondary metabolites in ways that are more favorable for their aphid  
611 vector, and hence, for their own transmission.

612 We first looked at jasmonic acid (JA) and its derivatives because they are plant signaling molecules  
613 related to plant defense against herbivorous insects, microbial pathogens and different abiotic stresses  
614 (Figure 9a). We observed a strong virus-specific and host-independent effect for JA synthesis genes.  
615 CaMV downregulated many genes in the JA pathway, while TuYV upregulated some. Like for other  
616 pathways, the effect was stronger in infected *Camelina* than in *Arabidopsis*. Deregulated genes were  
617 for example *AOC1/3/4* (3 out of for 4 chloroplastic allene oxide cyclases, involved in JA synthesis),  
618 *AOS* (AT5G42650, chloroplastic allene oxide synthase, involved in JA synthesis) and *LOX2*  
619 (AT3G45140, chloroplastic lipoxygenase required for wound-induced JA accumulation in  
620 *Arabidopsis*). All these genes were slightly upregulated in TuYV, and strongly repressed in CaMV-  
621 infected plants. This might imply that JA production is down in CaMV-infected plants and stable or  
622 slightly induced in TuYV-infected plants. JA is generally thought to decrease aphid growth and  
623 fecundity, so aphids on CaMV-infected plants might have greater fecundity. However, infection of  
624 *Arabidopsis* with CaMV lowered fecundity (Figure 3a). JA-mediated signaling pathways are also  
625 known to increase proteins and secondary metabolites, which act as feeding deterrents (Howe and  
626 Jander, 2008). In this context, decreased JA production in CaMV-infected *Arabidopsis* could  
627 encourage longer/faster phloem sap ingestion, which we observed indeed in our experiments (Figure  
628 2a). Interestingly, phloem sap ingestion has been correlated with increased CaMV acquisition  
629 (Palacios et al., 2002), which makes JA pathway a major candidate for virus manipulation.

630 We also analyzed ethylene (ET) synthesis (Figure 9b) as several studies have identified ET as a  
631 plant response against aphid infestation (Anstead et al., 2010; Mewis et al., 2005). No specific gene  
632 expression patterns characteristic for a virus or a host were found, indicating that the ethylene  
633 response was unique for each virus-host pair. Noteworthy, the ACC oxidase genes *ACO2* and *ACO5*  
634 (AT1G62380 and AT1G77330), involved in ethylene production, were strongly down-regulated for  
635 CaMV-infected host-plants. This is consistent with reduced accumulation of ethylene in CaMV-  
636 infected and P6-transgenic *Arabidopsis* in response to bacterial elicitors of innate immunity (Zvereva  
637 et al., 2016).

638 Glucosinolates (GLSs) are secondary metabolites that are produced by plants in the *Brassicaceae*  
639 family and set free in response to herbivore attacks (Kim et al., 2008). Some GLSs have been shown  
640 to be strong feeding deterrents for generalist aphids such as *M. persicae* (Kim and Jander, 2007) and  
641 might even have antibiosis effects on this aphid species (Cole, 1997; Westwood et al., 2013). CaMV  
642 infection down-regulated genes involved in GLS synthesis (Figure 9c), for example, the three  
643 *Camelina* orthologues encoding the cytochrome P450 monooxygenase *CYP83A1* (AT4G13770),  
644 whereas these three genes were upregulated in TuYV-infected *Camelina*. The effect of CaMV  
645 infection on *CYP83A1* was less pronounced in *Arabidopsis*, where another gene, *AT1G65880*,  
646 involved in benzoyloxyglucosinolate 1 synthesis, was strongly repressed. Other genes implicated in  
647 GLS synthesis, for example *IMD1* (AT5G14200), an isopropylmalate dehydrogenase (He et al., 2011)  
648 were upregulated in TuYV-infected *Camelina*. The transcription factor *MYB51* (AT1G18570),  
649 involved in indole glucosinolate synthesis (Barco and Clay, 2020), was downregulated in CaMV-  
650 infected *Camelina*, but not in the other conditions. All in all, infection with CaMV predominantly  
651 down-regulated transcription of GLS-related genes in *Camelina* and to a lesser extent in *Arabidopsis*,  
652 whereas TuYV infection induced GLS synthesis in aphid-infested *Camelina*, and had hardly any  
653 effect on *Arabidopsis*. We therefore expected that *M. persicae* fitness and feeding behavior (i.e.  
654 phloem sap ingestion and ease to access phloem tissues) would be enhanced on CaMV-infected  
655 *Camelina* and *Arabidopsis*, and be decreased on TuYV-infected *Camelina*. However, our fecundity  
656 experiments show that, on the contrary, *M. persicae* fecundity was decreased on CaMV-infected  
657 *Arabidopsis* and remained unchanged on TuYV-infected *Arabidopsis* compared to mock-inoculated  
658 plants, while no effects were observed on *Camelina* plants. Previous experiments indicated that *M.*  
659 *persicae* fecundity is even higher in TuYV-infected *Camelina* and lower in CaMV-infected *Camelina*  
660 (Chesnais et al., 2019a). Note, however, that in the experiment of Chesnais et al. (2019a), a more

661 severe CaMV strain was used, which might explain the discrepancies between both experiments.  
662 Overall, based on our results, deregulation of GLS-related genes after CaMV and TuYV infections  
663 do not seem to be the main factors controlling *M. persicae* fecundity. This is in line with another  
664 study that found no correlation between the GLS content of rapeseed and *M. persicae* fecundity  
665 (Weber et al., 1986).

666 On the other hand, our EPG experiments showed that aphids were able to reach phloem tissues  
667 and ingest phloem sap for a longer duration on CaMV-infected Arabidopsis and Camelina (see also  
668 Chesnais et al., 2019a; Chesnais et al., 2021). Therefore, down-regulation of GLS genes might  
669 encourage aphid settling/feeding behavior on CaMV-infected plants, and eventually promote CaMV  
670 acquisition by *M. persicae*. On TuYV-infected plants, while some GLS-related genes were slightly  
671 up-regulated, aphid feeding behavior was roughly equivalent to that on healthy plants, indicating that  
672 up-regulations were not strong enough to induce feeding deterrence.

673 Camalexin is the major phytoalexin and has been shown to reduce fecundity of aphids in  
674 Arabidopsis (Kettles et al., 2013), although its effect on aphids might not be straight-forward (Kloth  
675 et al., 2019; Pegadaraju et al., 2005). PAD3 (phytoalexin deficient 3) catalyzes the last step in its  
676 synthesis and CYP79B2 an important intermediate step. Here we found contrasting effects of aphid  
677 infestation on virus-infected plants on camalexin-related genes (Figure 9d). *PAD3* was downregulated  
678 in CaMV-infected and to a lesser extent in TuYV-infected Camelina, and slightly upregulated in  
679 Arabidopsis infected with CaMV or TuYV. *CYP79B2* expression was unaffected in both Camelina  
680 and Arabidopsis infected with TuYV, but substantially downregulated in CaMV-infected Camelina  
681 and slightly upregulated in CaMV-infected Arabidopsis. This indicates for both genes a strong host-  
682 plant effect. Evidence indicates that PAD3 contributes more to camalexin synthesis than CYP79B2  
683 (Kim et al., 2015; Zang et al., 2008; Zhang et al., 2020). Thus, looking at *PAD3*, aphid fecundity  
684 should be higher on CaMV- and TuYV-infected Camelina, and lower on infected Arabidopsis.  
685 However, we observed a lower fecundity in CaMV-infected Arabidopsis and unchanged aphid  
686 fecundity in all other conditions, which suggests that aphid fecundity is not only linked to *PAD3*  
687 expression. On the other hand, phloem ingestion on both CaMV-infected Arabidopsis and Camelina  
688 increased which is more in accordance with aphid plant acceptance. Overall, camalexin-related gene  
689 deregulations observed in both infected host plants did not seem to correlate with modified aphid  
690 fecundity, nor with aphid feeding behavior.

691 Callose is a polymer that is deposited by plants in between cells and in sieve tubes to restrict access  
692 of pathogens, including aphids, to tissues and phloem (Kuśnierczyk et al., 2008). We did not find any  
693 major DEG for this category except the stress-related plasma membrane respiratory burst oxidase  
694 Rboh F (Suzuki et al., 2011) and the pectin methylesterase inhibitor AT5G64640. No clear pattern of  
695 gene deregulation was observed, making interpretation difficult (Supplementary Figure S2). This  
696 might also be due posttranslational modifications that majorly regulate Rboh F activity (Kadota et  
697 al., 2015).

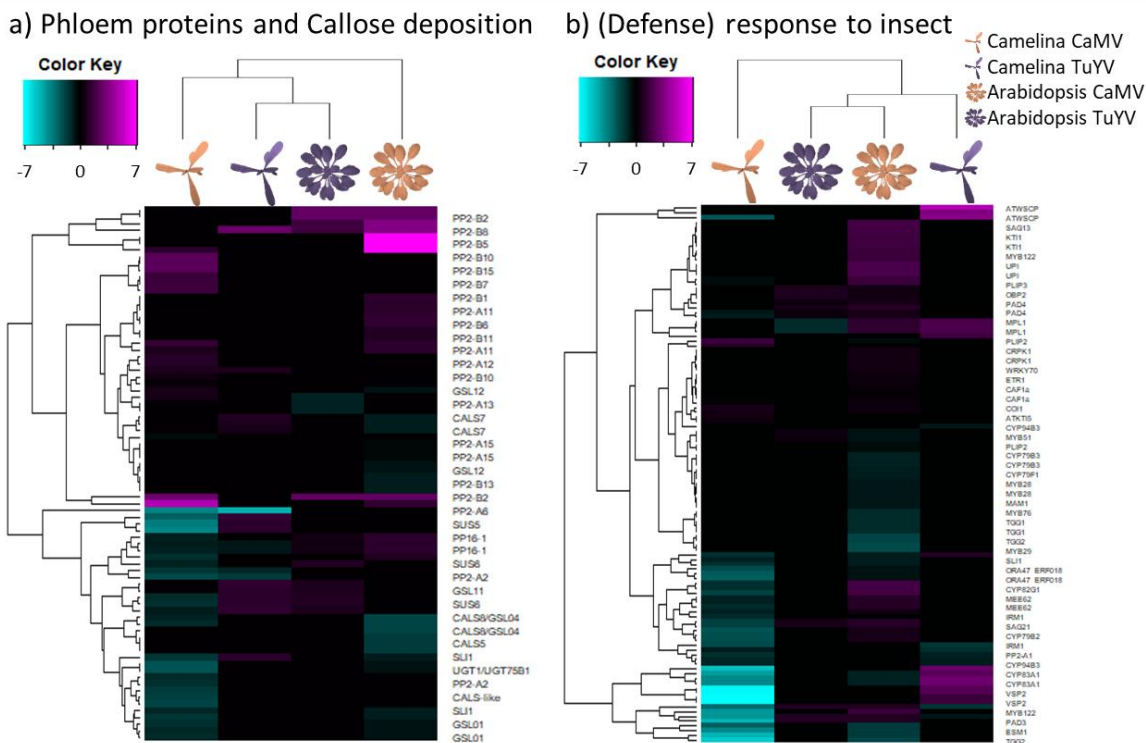

698  
 699 Figure 10. Hierarchical clustering of differentially expressed genes (DEGs) related to a) phloem proteins (PP2 and PP1)  
 700 and callose deposition in phloem sieve plates (GO:0080165) and b) defense response to insect and response to insect  
 701 (GO:0002213 and GO:0009625) in CaMV- and TuYV-infected Arabidopsis and Camelina compared to mock-inoculated  
 702 controls (Supplementary Dataset S2). The color key scales display the log<sub>2</sub>fold changes as gradients from cyan to  
 703 magenta.

704  
 705 Since aphid lifestyle depends on compatible interactions with the phloem they feed on, we looked  
 706 at phloem protein expression (Figure 10a). In all conditions except aphid-infested TuYV-infected  
 707 Camelina, *PP2-B2* was the strongest induced gene. *PP2-B2* codes for a phloem-specific lectin-like  
 708 protein with unknown function containing an F-box domain and a potential myristoylation site  
 709 (Boisson et al., 2003) that could control membrane localization. Specific for CaMV infection, the  
 710 putative phloem lectin genes *PP2-B1* (AT2G02230) and *PP2-B5* (AT2G02300) were upregulated in  
 711 Arabidopsis and one of their orthologues was upregulated in Camelina. The putative calcium-, lipid-  
 712 and RNA-binding phloem protein *PP16-1* (AT3G55470) was, independent of the virus, upregulated  
 713 in infected Arabidopsis and downregulated in Camelina. One Camelina orthologue of the Arabidopsis  
 714 *PP2-A1*, known to repress aphid phloem feeding (Zhang et al., 2011), was down-regulated in  
 715 Camelina infected with both CaMV and TuYV, but in Arabidopsis this gene remained non-responsive  
 716 to viral infections. It is worth mentioning that PP2 proteins of cucurbits could potentially bind to viral  
 717 particles of CABYV (genus *Polerovirus* like TuYV) and increase virus stability in the aphid gut  
 718 (Bencharki et al., 2010). Proteins of this type could therefore have a double importance due to their  
 719 role on vector aphids' feeding behavior and their possible involvement in virus transmission.  
 720 Deregulation of most other phloem proteins did not follow a distinct pattern and the unknown  
 721 functions of most of these genes precluded any interpretation.

722 *CalS7* (AT1G06490), a phloem-specific callose synthase responsible for wounding stress-induced  
 723 callose deposition onto sieve tube plates and hence phloem plugging (Xie et al., 2011), was slightly  
 724 upregulated in TuYV-infected Camelina and downregulated in CaMV-infected Arabidopsis. The  
 725 same trend (upregulation in TuYV-infected Camelina and Arabidopsis, downregulation in CaMV-  
 726 infected Camelina) applied to the phloem-located sucrose synthases *SUS5* and *SUS6* (AT5G37180  
 727 and AT1G73370) that interact with *CalS7* (Barratt et al., 2011). Also *SLI1* (AT3G10680), a gene  
 728 coding for a phloem small heat shock-like protein known to be involved in resistance to *M. persicae*  
 729 and other phloem feeders (Kloth et al., 2021), was downregulated in both Arabidopsis and Camelina  
 730 infected by CaMV. This might indicate that CaMV infection but not TuYV infection favors phloem

731 feeding of aphids by perturbing stress-related callose deposition on sieve plates. This is in line with  
732 the prolonged phloem ingestion observed for *M. persicae* on CaMV-infected plants (Figure 2).

733 Next, we examined expression of genes known to be involved in plant responses and defenses  
734 against insects (Figure 10b), as their modulation could influence virus-insect interactions and hence  
735 transmission. General trends were suppression in CaMV-infected Camelina and activation in CaMV-  
736 infected Arabidopsis and in TuYV-infected Camelina and Arabidopsis, resulting in both host-specific  
737 and virus-specific responses. *ESM1* (AT3G14210) was strongly downregulated in both CaMV-  
738 infected hosts, but not in TuYV-infected hosts. Its gene product biases production of glucosinolates,  
739 and its knockout mutant is more susceptible to herbivory by the caterpillar *Trichoplusia ni* (Zhang et  
740 al., 2006). Thus, its downregulation in CaMV-infected plants might favor aphid colonization.  
741 Expression of ATWSCP (AT1G72290), a protease inhibitor and water-soluble chlorophyll-binding  
742 protein, was strongly upregulated in TuYV-infected and downregulated in CaMV-infected Camelina,  
743 whereas its expression was unchanged in Arabidopsis. The apoplastic ATWSCP, together with the  
744 protease RD21, protects plants, especially greening plants, against herbivory (Boex-Fontvieille et al.,  
745 2015). Whether it also acts against aphids is unknown. The *M. persicae*-induced lipase 1 (MPL1,  
746 AT5G14180) was upregulated in TuYV-infected Camelina and CaMV-infected Arabidopsis, but  
747 downregulated in TuYV-infected Arabidopsis and unaffected in CaMV-infected Camelina. This gene  
748 is induced by aphid infestation and decreases aphid fecundity, but it does not change aphid behavior  
749 or plant choice (Louis et al., 2010). Whether the reduced fecundity of *M. persicae* on CaMV-infected  
750 Arabidopsis is partially due to the action of this gene, remains an open question. Strong host plant-  
751 specific and virus-specific effects were found for VSP2 [AT5G24770, reported to have a role in  
752 defense against herbivory insects (Liu et al., 2005)], whose expression was up-regulated in aphid-  
753 infested TuYV-infected Camelina and down-regulated in aphid-infested CaMV-infected Camelina  
754 but not affected in infested Arabidopsis. All in all, plant defense responses against insects did not  
755 follow a clear pattern. This was probably due to the very divergent pathways and the heterogeneity  
756 of the plant insect response genes.

### 757 **Concluding remarks**

758 In this work we analyzed the effect of CaMV and TuYV infection of *M. persicae* aphid-infested  
759 Arabidopsis and Camelina on the plant hosts' transcriptomes as well as on the fecundity and  
760 feeding behavior of their vector *M. persicae*.

761 Our results show that CaMV infection caused more severe effects on phenotype of both plant  
762 species than did TuYV infection (Figure 1). The severity of symptoms correlated strongly with the  
763 proportion of DEGs (41-43 % for CaMV, 5-11 % for TuYV, Figure 4e). CaMV infection affected the  
764 same percentage of genes in both plant hosts, whereas TuYV infection deregulated proportionally  
765 twice as much genes in Camelina than in Arabidopsis. Again, this correlated with stronger visible  
766 symptoms on TuYV-infected Camelina in comparison with TuYV-infected Arabidopsis. Aphid  
767 performance changes were more pronounced on CaMV-infected hosts, whatever the plant species,  
768 compared to those caused by TuYV infection. In spite of more DEGs in TuYV-infected Camelina  
769 than in TuYV-infected Arabidopsis, aphid behavior was slightly more impacted on TuYV-infected  
770 Arabidopsis (Figure 2). This likely indicates modification of plant metabolites that cannot be  
771 identified by transcriptome profiling. A metabolomic analysis of virus-infected leaves or phloem sap  
772 should provide complementary data on the aphid-plant-virus interactions.

773 In this study, we did not compare the contribution of aphid infestation alone on the plant  
774 transcriptome. However, recent work (Annacondia et al., 2021) on the transcriptome changes of  
775 healthy Arabidopsis plants infested or not with *M. persicae* for 72 h, identified a limited number of  
776 DEGs (265) suggesting that the contribution of aphid infestation to the transcriptome in healthy and  
777 probably also in virus-infected and infested plants is minor.

778 The most pronounced effect of CaMV infection on plant hosts was a strong downregulation of  
779 photosynthesis genes (Figure 6) and carbohydrate metabolism-related genes (Figure 7). We observed  
780 significant changes in many other pathways, including categories that are likely affecting virus-vector  
781 interactions (*i.e.* defenses, silencing, hormones, secondary metabolites etc.). However, the impact of

782 these modifications on aphid fitness or feeding behavior was not easy to evaluate since these  
783 parameters are likely under the control of several, often overlapping metabolic pathways. Trying to  
784 correlate the effect of specific genes on aphids as reported in the literature with our aphid behavior  
785 observations therefore often resulted in contrasting results. We offer the following explanations. The  
786 very strong alterations in photosynthesis might have drowned otherwise visible effects of DEGs  
787 previously found to be involved in plant-aphid interactions. Another explanation are  
788 posttranscriptional and posttranslational modifications. While transcriptome profiling is a powerful  
789 tool, it can display only changes of transcript levels. In many cases, however, posttranslational  
790 modifications of proteins (such as phosphorylation, localization, complex formation and many more)  
791 and even posttranscriptional RNA modifications (sequestering of RNAs in p-bodies and others) will  
792 contribute to phenotype changes. Depending on the pathway, the contribution of transcriptome and  
793 posttranscriptome on cellular processes and beyond will vary. This again indicates that  
794 complementary analyses such as metabolomics, proteomics etc. might help to gain a more complete  
795 insight.

796 Nevertheless, we observe that virus infections, whatever the host plant, have very distinct effects  
797 on the transcriptome of host plants, and that, as expected, the non-phloem-limited virus (i.e. CaMV)  
798 has a significantly stronger impact on plant hosts than the phloem-limited virus (i.e. TuYV). Overall,  
799 viral infection with CaMV tends to have effects on metabolic pathways with strong potential  
800 implications for insect-vector / plant-host interactions, while TuYV only weakly alters these  
801 pathways. For example, the strong gene downregulations in the jasmonic acid, ethylene and  
802 glucosinolate biosynthetic processes (Figure 9a-c) in CaMV-infected plants could be responsible for  
803 the observed alterations of aphid feeding behavior and performances. Next steps could consist in  
804 functional validation of some candidate genes identified in our study for their role in viral  
805 manipulation and consequently potential impacts on viral transmission.

#### 806 **Data availability**

807 The raw RNA-seq data are available under project number PRJEB49403 at the European Nucleotide  
808 Archive (<https://www.ebi.ac.uk/ena/browser/view/PRJEB49403>).

#### 809 **Author contributions**

810 Conceptualization, Q.C., V.B., M.P. and M.D.; methodology, Q.C., V.G. and M.D.; software, Q.C.,  
811 A.V. and C.R.; validation, Q.C. and V.G.; formal analysis, Q.C., A.V., C.R. and M.D.; investigation,  
812 Q.C. and V.G.; Data curation, Q.C., A.V. and C.R.; Writing – Original Draft Preparation, Q.C., M.P.  
813 and M.D.; Writing – Review & Editing, Q.C., A.V., C.R., V.B., M.P. and M.D.; Visualization, Q.C.;  
814 supervision, M.P. and M.D.; project administration, M.D.; funding acquisition, M.P. and M.D.

815

#### 816 **Acknowledgments**

817 We thank Claire Villeroy for aphid rearing and the experimental unit of INRAE Grand Est – Colmar  
818 (UEAV) for help with plant production. This work was supported by a public grant overseen by the  
819 French National Research Agency (ANR) (reference: ROME ANR-18-CE20-0017-01). Dr. Quentin  
820 Chesnais was supported by Région Grand Est (Soutien aux jeunes chercheurs, reference:  
821 18\_GE5\_013). The funding sources had no role in the study design; in the collection, analysis, and  
822 interpretation of data; in the writing of the report; and in the decision to submit the article for  
823 publication. The authors declare no conflict of interest.

824

## 825 **References**

- 826 A'Brook, J. (1973) Observations on different methods of aphid trapping. *Annals of Applied Biology*,  
827 74, 263–277. <https://doi.org/10.1111/j.1744-7348.1973.tb07747.x>.
- 828 Afgan, E., Baker, D., van den Beek, M., Blankenberg, D., Bouvier, D., Čech, M., et al. (2016) The  
829 Galaxy platform for accessible, reproducible and collaborative biomedical analyses: 2016 update.  
830 *Nucleic Acids Research*, 44, W3–W10. <https://doi.org/10.1093/nar/gkw343>.
- 831 Annacondia, M.L., Markovic, D., Reig-Valiente, J.L., Scaltsoyiannes, V., Pieterse, C.M.J.,  
832 Ninkovic, V., et al. (2021) Aphid feeding induces the relaxation of epigenetic control and the  
833 associated regulation of the defense response in *Arabidopsis*. *New Phytologist*, 230, 1185–1200.  
834 <https://doi.org/10.1111/nph.17226>.
- 835 Anstead, J., Samuel, P., Song, N., Wu, C., Thompson, G.A. & Goggin, F. (2010) Activation of  
836 ethylene-related genes in response to aphid feeding on resistant and susceptible melon and tomato  
837 plants. *Entomologia Experimentalis et Applicata*, 134, 170–181. <https://doi.org/10.1111/j.1570-7458.2009.00945.x>.
- 839 Barco, B. & Clay, N.K. (2020) Hierarchical and Dynamic Regulation of Defense-Responsive  
840 Specialized Metabolism by WRKY and MYB Transcription Factors. *Frontiers in Plant Science*, 10,  
841 1775. <https://doi.org/10.3389/fpls.2019.01775>.
- 842 Barratt, D.H.P., Kölling, K., Graf, A., Pike, M., Calder, G., Findlay, K., et al. (2011) Callose  
843 Synthase GSL7 Is Necessary for Normal Phloem Transport and Inflorescence Growth in  
844 *Arabidopsis*. *Plant Physiology*, 155, 328–341. <https://doi.org/10.1104/pp.110.166330>.
- 845 Bencharki, B., Boissinot, S., Revollon, S., Ziegler-Graff, V., Erdinger, M., Wiss, L., et al. (2010)  
846 Phloem Protein Partners of *Cucurbit aphid borne yellows virus* : Possible Involvement of Phloem  
847 Proteins in Virus Transmission by Aphids. *Molecular Plant-Microbe Interactions*®, 23, 799–810.  
848 <https://doi.org/10.1094/MPMI-23-6-0799>.
- 849 Blanc, S., Drucker, M. & Uzest-Bonhomme, M. (2014) Localizing viruses in their insect vectors.  
850 *Annual Review of Phytopathology*, 52, 403–425. <https://doi.org/10.1146/annurev-phyto-102313-045920>.
- 852 Blevins, T., Rajeswaran, R., Shivaprasad, P.V., Beknazariants, D., Si-Ammour, A., Park, H.-S., et  
853 al. (2006) Four plant Dicers mediate viral small RNA biogenesis and DNA virus induced silencing.  
854 *Nucleic Acids Research*, 34, 6233–6246. <https://doi.org/10.1093/nar/gkl886>.
- 855 Boex-Fontvieille, E., Rustgi, S., Wettstein, D. von, Reinbothe, S. & Reinbothe, C. (2015) Water-  
856 soluble chlorophyll protein is involved in herbivore resistance activation during greening of  
857 *Arabidopsis thaliana*. *Proceedings of the National Academy of Sciences*, 112, 7303–7308.  
858 <https://doi.org/10.1073/pnas.1507714112>.
- 859 Bogaert, F., Marmonier, A., Pichon, E., Boissinot, S., Ziegler-Graff, V., Chesnais, Q., et al. (2020)  
860 Impact of Mutations in *Arabidopsis thaliana* Metabolic Pathways on Polerovirus Accumulation,  
861 Aphid Performance, and Feeding Behavior. *Viruses*, 12, 146. <https://doi.org/10.3390/v12020146>.
- 862 Boisson, B., Giglione, C. & Meinnel, T. (2003) Unexpected Protein Families Including Cell  
863 Defense Components Feature in the N-Myristoylome of a Higher Eukaryote. *Journal of Biological  
864 Chemistry*, 278, 43418–43429. <https://doi.org/10.1074/jbc.M307321200>.
- 865 Bosque-Pérez, N.A. & Eigenbrode, S.D. (2011) The influence of virus-induced changes in plants on  
866 aphid vectors: insights from luteovirus pathosystems. *Virus Research*, 159, 201–205.  
867 <https://doi.org/10.1016/j.virusres.2011.04.020>.
- 868 Brault, V., Herrbach, E. & Reinbold, C. (2007) Electron microscopy studies on luteovirid  
869 transmission by aphids. *Micron (Oxford, England: 1993)*, 38, 302–312.  
870 <https://doi.org/10.1016/j.micron.2006.04.005>.
- 871 Briat, J.-F., Ravet, K., Arnaud, N., Duc, C., Boucherez, J., Touraine, B., et al. (2010) New insights  
872 into ferritin synthesis and function highlight a link between iron homeostasis and oxidative stress in  
873 plants. *Annals of Botany*, 105, 811–822. <https://doi.org/10.1093/aob/mcp128>.



- 874 Campbell, B.C., Jones, K.C. & Dreyer, D.L. (1986) Discriminative behavioral responses by aphids  
875 to various plant matrix Polysaccharides. *Entomologia Experimentalis et Applicata*, 41, 17–24.  
876 <https://doi.org/10.1111/j.1570-7458.1986.tb02166.x>.
- 877 Carbonell, A. & Carrington, J.C. (2015) Antiviral roles of plant ARGONAUTES. *Current Opinion*  
878 *in Plant Biology*, 27, 111–117. <https://doi.org/10.1016/j.pbi.2015.06.013>.
- 879 Carr, J.P., Tungadi, T., Donnelly, R., Bravo-Cazar, A., Rhee, S.-J., Watt, L.G., et al. (2020)  
880 Modelling and manipulation of aphid-mediated spread of non-persistently transmitted viruses. *Virus*  
881 *Research*, 277, 197845. <https://doi.org/10.1016/j.virusres.2019.197845>.
- 882 Chen, X., Smith, M.D., Fitzpatrick, L. & Schnell, D.J. (2002) In Vivo Analysis of the Role of  
883 atTic20 in Protein Import into Chloroplasts. *The Plant Cell*, 14, 641–654.  
884 <https://doi.org/10.1105/tpc.010336>.
- 885 Chen, X.-R., Wang, Y., Zhao, H.-H., Zhang, X.-Y., Wang, X.-B., Li, D.-W., et al. (2018) Brassica  
886 yellows virus' movement protein upregulates anthocyanin accumulation, leading to the  
887 development of purple leaf symptoms on *Arabidopsis thaliana*. *Scientific Reports*, 8, 16273.  
888 <https://doi.org/10.1038/s41598-018-34591-5>.
- 889 Cheng, G., Yang, Z., Zhang, H., Zhang, J. & Xu, J. (2020) Remorin interacting with PCaP1 impairs  
890 *Turnip mosaic virus* intercellular movement but is antagonised by VPg. *New Phytologist*, 225,  
891 2122–2139. <https://doi.org/10.1111/nph.16285>.
- 892 Chesnais, Q., Couty, A., Uzest, M., Brault, V. & Ameline, A. (2019a) Plant infection by two  
893 different viruses induce contrasting changes of vectors fitness and behavior. *Insect Science*, 26, 86–  
894 96. <https://doi.org/10.1111/1744-7917.12508>.
- 895 Chesnais, Q., Mauck, K.E., Bogaert, F., Bamière, A., Catterou, M., Spicher, F., et al. (2019b) Virus  
896 effects on plant quality and vector behavior are species specific and do not depend on host  
897 physiological phenotype. *Journal of Pest Science*, 92, 791–804. <https://doi.org/10.1007/s10340-019-01082-z>.
- 899 Chesnais, Q., Verdier, M., Burckbuchler, M., Brault, V., Pooggin, M. & Drucker, M. (2021)  
900 Cauliflower mosaic virus protein P6-TAV plays a major role in alteration of aphid vector feeding  
901 behaviour but not performance on infected *Arabidopsis*. *Molecular Plant Pathology*, 22, 911–920.  
902 <https://doi.org/10.1111/mpp.13069>.
- 903 Cole, R.A. (1997) The relative importance of glucosinolates and amino acids to the development of  
904 two aphid pests *Brevicoryne brassicae* and *Myzus persicae* on wild and cultivated brassica species.  
905 *Entomologia Experimentalis et Applicata*, 85, 121–133. <https://doi.org/10.1046/j.1570-7458.1997.00242.x>.
- 907 Cosson, P., Sofer, L., Le, Q.H., Léger, V., Schurdi-Levraud, V., Whitham, S.A., et al. (2010)  
908 RTM3, which controls long-distance movement of potyviruses, is a member of a new plant gene  
909 family encoding a meprin and TRAF homology domain-containing protein. *Plant Physiology*, 154,  
910 222–232. <https://doi.org/10.1104/pp.110.155754>.
- 911 Dáder, B., Then, C., Berthelot, E., Ducouso, M., Ng, J.C.K. & Drucker, M. (2017) Insect  
912 transmission of plant viruses: Multilayered interactions optimize viral propagation. *Insect Science*,  
913 24, 929–946. <https://doi.org/10.1111/1744-7917.12470>.
- 914 Dietzgen, R.G., Mann, K.S. & Johnson, K.N. (2016) Plant Virus-Insect Vector Interactions: Current  
915 and Potential Future Research Directions. *Viruses*, 8. <https://doi.org/10.3390/v8110303>.
- 916 Fennell, J.T., Wilby, A., Sobeih, W. & Paul, N.D. (2020) New understanding of the direct effects of  
917 spectral balance on behaviour in *Myzus persicae*. *Journal of Insect Physiology*, 126, 104096.  
918 <https://doi.org/10.1016/j.jinsphys.2020.104096>.
- 919 Fereres, A. & Moreno, A. (2009) Behavioural aspects influencing plant virus transmission by  
920 homopteran insects. *Virus Research*, 141, 158–168. <https://doi.org/10.1016/j.virusres.2008.10.020>.
- 921 Fereres, A. & Raccah, B. (2015) Plant Virus Transmission by Insects. In: John Wiley & Sons Ltd  
922 (Ed.) eLS. Chichester, UK: John Wiley & Sons, Ltd, pp. 1–12.

- 923 Giordanengo, P. (2014) EPG-Calc: a PHP-based script to calculate electrical penetration graph  
924 (EPG) parameters. *Arthropod-Plant Interactions*, 8, 163–169. [https://doi.org/10.1007/s11829-014-](https://doi.org/10.1007/s11829-014-9298-z)  
925 9298-z.
- 926 Golyaev, V., Candresse, T., Rabenstein, F. & Pooggin, M.M. (2019) Plant virome reconstruction  
927 and antiviral RNAi characterization by deep sequencing of small RNAs from dried leaves. *Scientific*  
928 *Reports*, 9, 19268. <https://doi.org/10.1038/s41598-019-55547-3>.
- 929 Haas, G., Azevedo, J., Moissiard, G., Geldreich, A., Himber, C., Bureau, M., et al. (2008) Nuclear  
930 import of CaMV P6 is required for infection and suppression of the RNA silencing factor DRB4.  
931 *The EMBO Journal*, 27, 2102–2112. <https://doi.org/10.1038/emboj.2008.129>.
- 932 He, Y., Galant, A., Pang, Q., Strul, J.M., Balogun, S.F., Jez, J.M., et al. (2011) Structural and  
933 functional evolution of isopropylmalate dehydrogenases in the leucine and glucosinolate pathways  
934 of *Arabidopsis thaliana*. *The Journal of Biological Chemistry*, 286, 28794–28801.  
935 <https://doi.org/10.1074/jbc.M111.262519>.
- 936 Hodge, S., Ward, J.L., Beale, M.H., Bennett, M., Mansfield, J.W. & Powell, G. (2013) Aphid-  
937 induced accumulation of trehalose in *Arabidopsis thaliana* is systemic and dependent upon aphid  
938 density. *Planta*, 237, 1057–1064. <https://doi.org/10.1007/s00425-012-1826-4>.
- 939 Howe, G.A. & Jander, G. (2008) Plant Immunity to Insect Herbivores. *Annual Review of Plant*  
940 *Biology*, 59, 41–66. <https://doi.org/10.1146/annurev.arplant.59.032607.092825>.
- 941 Kadota, Y., Shirasu, K. & Zipfel, C. (2015) Regulation of the NADPH Oxidase RBOHD During  
942 Plant Immunity. *Plant and Cell Physiology*, 56, 1472–1480. <https://doi.org/10.1093/pcp/pcv063>.
- 943 Kagale, S., Koh, C., Nixon, J., Bollina, V., Clarke, W.E., Tuteja, R., et al. (2014) The emerging  
944 biofuel crop *Camelina sativa* retains a highly undifferentiated hexaploid genome structure. *Nature*  
945 *Communications*, 5, 3706. <https://doi.org/10.1038/ncomms4706>.
- 946 Kennedy, J.S., Day, M.F. & Eastop, V.F. (1962) A conspectus of aphids as vectors of plant viruses.  
947 Eastern Press Ltd., London and Reading. London: Commonwealth Inst. Entomol.
- 948 Kettles, G.J., Drurey, C., Schoonbeek, H., Maule, A.J. & Hogenhout, S.A. (2013) Resistance of *A*  
949 *rabidopsis thaliana* to the green peach aphid, *Myzus persicae*, involves camalexin and is  
950 regulated by micro RNA s. *New Phytologist*, 198, 1178–1190. <https://doi.org/10.1111/nph.12218>.
- 951 Kim, J.H. & Jander, G. (2007) *Myzus persicae* (green peach aphid) feeding on *Arabidopsis* induces  
952 the formation of a deterrent indole glucosinolate: Aphid-induced glucosinolate changes. *The Plant*  
953 *Journal*, 49, 1008–1019. <https://doi.org/10.1111/j.1365-313X.2006.03019.x>.
- 954 Kim, J.H., Lee, B.W., Schroeder, F.C. & Jander, G. (2008) Identification of indole glucosinolate  
955 breakdown products with antifeedant effects on *Myzus persicae* (green peach aphid). *The Plant*  
956 *Journal: For Cell and Molecular Biology*, 54, 1015–1026. [https://doi.org/10.1111/j.1365-](https://doi.org/10.1111/j.1365-313X.2008.03476.x)  
957 313X.2008.03476.x.
- 958 Kim, J.I., Dolan, W.L., Anderson, N.A. & Chapple, C. (2015) Indole Glucosinolate Biosynthesis  
959 Limits Phenylpropanoid Accumulation in *Arabidopsis thaliana*. *The Plant Cell*, 27, 1529–1546.  
960 <https://doi.org/10.1105/tpc.15.00127>.
- 961 Kloth, K.J., Abreu, I.N., Delhomme, N., Petřík, I., Villard, C., Ström, C., et al. (2019) PECTIN  
962 ACETYLESTERASE9 Affects the Transcriptome and Metabolome and Delays Aphid Feeding.  
963 *Plant Physiology*, 181, 1704–1720. <https://doi.org/10.1104/pp.19.00635>.
- 964 Kloth, K.J. & Kormelink, R. (2020) Defenses against Virus and Vector: A Phloem-Biological  
965 Perspective on RTM- and SLI1-Mediated Resistance to Potyviruses and Aphids. *Viruses*, 12, 129.  
966 <https://doi.org/10.3390/v12020129>.
- 967 Kloth, K.J., Shah, P., Broekgaarden, C., Ström, C., Albrechtsen, B.R. & Dicke, M. (2021) SLI1  
968 confers broad-spectrum resistance to phloem-feeding insects. *Plant, Cell & Environment*, 44, 2765–  
969 2776. <https://doi.org/10.1111/pce.14064>.
- 970 Kloth, K.J., Wieggers, G.L., Busscher-Lange, J., Haarst, J.C. van, Kruijer, W., Bouwmeester, H.J., et  
971 al. (2016) AtWRKY22 promotes susceptibility to aphids and modulates salicylic acid and jasmonic

- 972 acid signalling. *Journal of Experimental Botany*, 67, 3383–3396.  
973 <https://doi.org/10.1093/jxb/erw159>.
- 974 Kubina, J., Geldreich, A., Gales, J.P., Baumberger, N., Bouton, C., Ryabova, L.A., et al. (2021)  
975 Nuclear export of plant pararetrovirus mRNAs involves the TREX complex, two viral proteins and  
976 the highly structured 5' leader region. *Nucleic Acids Research*, 49, 8900–8922.  
977 <https://doi.org/10.1093/nar/gkab653>.
- 978 Kuśnierczyk, A., Winge, P., Jørstad, T.S., Troczyńska, J., Rossiter, J.T. & Bones, A.M. (2008)  
979 Towards global understanding of plant defence against aphids--timing and dynamics of early  
980 Arabidopsis defence responses to cabbage aphid (*Brevicoryne brassicae*) attack. *Plant, Cell &  
981 Environment*, 31, 1097–1115. <https://doi.org/10.1111/j.1365-3040.2008.01823.x>.
- 982 Liu, Y., Ahn, J.-E., Datta, S., Salzman, R.A., Moon, J., Huyghues-Despointes, B., et al. (2005)  
983 Arabidopsis Vegetative Storage Protein Is an Anti-Insect Acid Phosphatase. *Plant Physiology*, 139,  
984 1545–1556. <https://doi.org/10.1104/pp.105.066837>.
- 985 Louis, J., Lorenc-Kukula, K., Singh, V., Reese, J., Jander, G. & Shah, J. (2010) Antibiosis against  
986 the green peach aphid requires the Arabidopsis thaliana MYZUS PERSICAE-INDUCED LIPASE1  
987 gene: Plant-aphid interaction. *The Plant Journal*, 64, 800–811. <https://doi.org/10.1111/j.1365-313X.2010.04378.x>.
- 989 Lu, H., Zhu, J., Yu, J., Chen, X., Kang, L. & Cui, F. (2020) A Symbiotic Virus Facilitates Aphid  
990 Adaptation to Host Plants by Suppressing Jasmonic Acid Responses. *Molecular plant-microbe  
991 interactions: MPMI*, 33, 55–65. <https://doi.org/10.1094/MPMI-01-19-0016-R>.
- 992 Malik, M.R., Tang, J., Sharma, N., Burkitt, C., Ji, Y., Mykytyshyn, M., et al. (2018) Camelina  
993 sativa, an oilseed at the nexus between model system and commercial crop. *Plant Cell Reports*, 37,  
994 1367–1381. <https://doi.org/10.1007/s00299-018-2308-3>.
- 995 Martin, B., Collar, J.L., Tjallingii, W.F. & Fereres, A. (1997) Intracellular ingestion and salivation  
996 by aphids may cause the acquisition and inoculation of non-persistently transmitted plant viruses. *J.  
997 Gen. Virol.*, 78, 2701–2705.
- 998 Mauck, K., Bosque-Pérez, N.A., Eigenbrode, S.D., De Moraes, C.M. & Mescher, M.C. (2012)  
999 Transmission mechanisms shape pathogen effects on host–vector interactions: evidence from plant  
1000 viruses. *Functional Ecology*, 26, 1162–1175. <https://doi.org/10.1111/j.1365-2435.2012.02026.x>.
- 1001 Mauck, K.E. & Chesnais, Q. (2020) A synthesis of virus-vector associations reveals important  
1002 deficiencies in studies on host and vector manipulation by plant viruses. *Virus Research*, 285,  
1003 197957. <https://doi.org/10.1016/j.virusres.2020.197957>.
- 1004 Mauck, K.E., Chesnais, Q. & Shapiro, L.R. (2018) Evolutionary Determinants of Host and Vector  
1005 Manipulation by Plant Viruses. *Advances in Virus Research*, 101, 189–250.  
1006 <https://doi.org/10.1016/bs.aivir.2018.02.007>.
- 1007 Mauck, K.E., De Moraes, C.M. & Mescher, M.C. (2014) Biochemical and physiological  
1008 mechanisms underlying effects of Cucumber mosaic virus on host-plant traits that mediate  
1009 transmission by aphid vectors. *Plant, Cell & Environment*, 37, 1427–1439.  
1010 <https://doi.org/10.1111/pce.12249>.
- 1011 Mauck, K.E., De Moraes, C.M. & Mescher, M.C. (2010) Deceptive chemical signals induced by a  
1012 plant virus attract insect vectors to inferior hosts. *Proceedings of the National Academy of Sciences  
1013 of the United States of America*, 107, 3600–3605. <https://doi.org/10.1073/pnas.0907191107>.
- 1014 Mauck, K.E., Kenney, J. & Chesnais, Q. (2019) Progress and challenges in identifying molecular  
1015 mechanisms underlying host and vector manipulation by plant viruses. *Current Opinion in Insect  
1016 Science*, 33, 7–18. <https://doi.org/10.1016/j.cois.2019.01.001>.
- 1017 Mewis, I., Appel, H.M., Hom, A., Raina, R. & Schultz, J.C. (2005) Major signaling pathways  
1018 modulate Arabidopsis glucosinolate accumulation and response to both phloem-feeding and  
1019 chewing insects. *Plant Physiology*, 138, 1149–1162. <https://doi.org/10.1104/pp.104.053389>.

- 1020 Morante-Carriel, J., Sellés-Marchart, S., Martínez-Márquez, A., Martínez-Esteso, M.J., Luque, I. &  
1021 Bru-Martínez, R. (2014) RNA isolation from loquat and other recalcitrant woody plants with high  
1022 quality and yield. *Analytical Biochemistry*, 452, 46–53. <https://doi.org/10.1016/j.ab.2014.02.010>.
- 1023 Moreno, A., Tjallingii, W.F., Fernandez-Mata, G. & Fereres, A. (2012) Differences in the  
1024 mechanism of inoculation between a semi-persistent and a non-persistent aphid-transmitted plant  
1025 virus. *Journal of General Virology*, 93, 662–667. <https://doi.org/10.1099/vir.0.037887-0>.
- 1026 Mulot, M., Monsion, B., Boissinot, S., Rastegar, M., Meyer, S., Bochet, N., et al. (2018)  
1027 Transmission of Turnip yellows virus by *Myzus persicae* Is Reduced by Feeding Aphids on  
1028 Double-Stranded RNA Targeting the Ephrin Receptor Protein. *Frontiers in Microbiology*, 9, 457.  
1029 <https://doi.org/10.3389/fmicb.2018.00457>.
- 1030 Ng, J.C.K. & Falk, B.W. (2006) Virus-vector interactions mediating nonpersistent and  
1031 semipersistent transmission of plant viruses. *Annual Review of Phytopathology*, 44, 183–212.  
1032 <https://doi.org/10.1146/annurev.phyto.44.070505.143325>.
- 1033 Omae, N., Suzuki, M. & Ugaki, M. (2020) The genome of the Cauliflower mosaic virus, a plant  
1034 pararetrovirus, is highly methylated in the nucleus. *FEBS Letters*, 594, 1974–1988.  
1035 <https://doi.org/10.1002/1873-3468.13852>.
- 1036 Palacios, I., Drucker, M., Blanc, S., Leite, S., Moreno, A. & Fereres, A. (2002) Cauliflower mosaic  
1037 virus is preferentially acquired from the phloem by its aphid vectors. *The Journal of General*  
1038 *Virology*, 83, 3163–3171.
- 1039 Pegadaraju, V., Knepper, C., Reese, J. & Shah, J. (2005) Premature leaf senescence modulated by  
1040 the Arabidopsis PHYTOALEXIN DEFICIENT4 gene is associated with defense against the  
1041 phloem-feeding green peach aphid. *Plant Physiology*, 139, 1927–1934.  
1042 <https://doi.org/10.1104/pp.105.070433>.
- 1043 Raffaele, S., Bayer, E., Lafarge, D., Cluzet, S., German Retana, S., Boubekur, T., et al. (2009)  
1044 Remorin, a Solanaceae Protein Resident in Membrane Rafts and Plasmodesmata, Impairs *Potato*  
1045 *virus X* Movement. *The Plant Cell*, 21, 1541–1555. <https://doi.org/10.1105/tpc.108.064279>.
- 1046 Rodriguez, P.A. & Bos, J.I.B. (2013) Toward understanding the role of aphid effectors in plant  
1047 infestation. *Molecular plant-microbe interactions: MPMI*, 26, 25–30.  
1048 <https://doi.org/10.1094/MPMI-05-12-0119-FI>.
- 1049 Schuck, J., Gursinsky, T., Pantaleo, V., Burguán, J. & Behrens, S.-E. (2013) AGO/RISC-mediated  
1050 antiviral RNA silencing in a plant in vitro system. *Nucleic Acids Research*, 41, 5090–5103.  
1051 <https://doi.org/10.1093/nar/gkt193>.
- 1052 Shivaprasad, P.V., Rajeswaran, R., Blevins, T., Schoelz, J., Meins, F., Jr, Hohn, T., et al. (2008)  
1053 The CaMV transactivator/viroplasm interferes with RDR6-dependent trans-acting and secondary  
1054 siRNA pathways in Arabidopsis. *Nucleic Acids Research*, 36, 5896–5909.  
1055 <https://doi.org/10.1093/nar/gkn590>.
- 1056 Singh, V., Louis, J., Ayre, B.G., Reese, J.C., Pegadaraju, V. & Shah, J. (2011) TREHALOSE  
1057 PHOSPHATE SYNTHASE11-dependent trehalose metabolism promotes Arabidopsis thaliana  
1058 defense against the phloem-feeding insect *Myzus persicae*. *The Plant Journal: For Cell and*  
1059 *Molecular Biology*, 67, 94–104. <https://doi.org/10.1111/j.1365-313X.2011.04583.x>.
- 1060 Singh, V. & Shah, J. (2012) Tomato responds to green peach aphid infestation with the activation of  
1061 trehalose metabolism and starch accumulation. *Plant Signaling & Behavior*, 7, 605–607.  
1062 <https://doi.org/10.4161/psb.20066>.
- 1063 Suzuki, N., Miller, G., Morales, J., Shulaev, V., Torres, M.A. & Mittler, R. (2011) Respiratory burst  
1064 oxidases: the engines of ROS signaling. *Current Opinion in Plant Biology*, 14, 691–699.  
1065 <https://doi.org/10.1016/j.pbi.2011.07.014>.
- 1066 Tjallingii, W.F. (1988) Electrical recording of stylet penetration activities. Aphids, their biology,  
1067 natural enemies and control. Amsterdam: Elsevier Science Publishers, pp. 95–108.

- 1068 Tjallingii, W.F. & Hogen Esch, T. (1993) Fine structure of aphid stylet routes in plant tissues in  
1069 correlation with EPG signals. *Physiol. Entomol.*, 18, 317–328. <https://doi.org/10.1111/j.1365-3032.1993.tb00604.x>.
- 1071 Tsuge, S., Kobayashi, K., Nakayashiki, H., Okuno, T. & Furusawa, I. (1994) Replication of  
1072 cauliflower mosaic virus ORF I mutants in turnip protoplasts. *Ann Phytopath Soc Japan*, 60, 27–35.
- 1073 Veidt, I., Lot, H., Leiser, M., Scheidecker, D., Guilley, H., Richards, K., et al. (1988) Nucleotide  
1074 sequence of beet western yellows virus RNA. *Nucleic Acids Research*, 16, 9917–9932.  
1075 <https://doi.org/10.1093/nar/16.21.9917>.
- 1076 Weber, G., Oswald, S. & Zollner, U. (1986) Die Wirtseignung von Rapsorten unterschiedlichen  
1077 Glucosinolatgehalts fuer *Brevicoryne brassicae* (L.) und *Myzus persicae* (Sulzer) (Hemiptera,  
1078 *Aphididae*). *Zeitschrift für Pflanzenkrankheiten und Pflanzenschutz*, 93, 113–124.
- 1079 Westwood, J.H., Groen, S.C., Du, Z., Murphy, A.M., Anggoro, D.T., Tungadi, T., et al. (2013) A  
1080 Trio of Viral Proteins Tunes Aphid-Plant Interactions in *Arabidopsis thaliana* Rao, A.L.N. (Ed.).  
1081 *PLoS ONE*, 8, e83066. <https://doi.org/10.1371/journal.pone.0083066>.
- 1082 Xie, B., Wang, X., Zhu, M., Zhang, Z. & Hong, Z. (2011) *Cals7* encodes a callose synthase  
1083 responsible for callose deposition in the phloem: A *phloem-specific callose synthase*. *The Plant*  
1084 *Journal*, 65, 1–14. <https://doi.org/10.1111/j.1365-313X.2010.04399.x>.
- 1085 Yu, Y., Ji, L., Le, B.H., Zhai, J., Chen, J., Luscher, E., et al. (2017) ARGONAUTE10 promotes the  
1086 degradation of miR165/6 through the SDN1 and SDN2 exonucleases in *Arabidopsis* Zamore, P.  
1087 (Ed.). *PLOS Biology*, 15, e2001272. <https://doi.org/10.1371/journal.pbio.2001272>.
- 1088 Zang, Y.-X., Lim, M.-H., Park, B.-S., Hong, S.-B. & Kim, D.H. (2008) Metabolic engineering of  
1089 indole glucosinolates in Chinese cabbage plants by expression of *Arabidopsis* CYP79B2,  
1090 CYP79B3, and CYP83B1. *Molecules and Cells*, 25, 231–241.
- 1091 Zhang, C., Shi, H., Chen, L., Wang, X., Lü, B., Zhang, S., et al. (2011) Harpin-induced expression  
1092 and transgenic overexpression of the phloem protein gene *AtPP2-A1* in *Arabidopsis* repress phloem  
1093 feeding of the green peach aphid *Myzus persicae*. *BMC Plant Biology*, 11, 11.  
1094 <https://doi.org/10.1186/1471-2229-11-11>.
- 1095 Zhang, D., Song, Y.H., Dai, R., Lee, T.G. & Kim, J. (2020) Aldoxime Metabolism Is Linked to  
1096 Phenylpropanoid Production in *Camelina sativa*. *Frontiers in Plant Science*, 11, 17.  
1097 <https://doi.org/10.3389/fpls.2020.00017>.
- 1098 Zhang, Z., Ober, J.A. & Kliebenstein, D.J. (2006) The Gene Controlling the Quantitative Trait  
1099 Locus *EPITHIOSPECIFIER MODIFIER1* Alters Glucosinolate Hydrolysis and Insect Resistance in  
1100 *Arabidopsis*. *The Plant Cell*, 18, 1524–1536. <https://doi.org/10.1105/tpc.105.039602>.
- 1101 Zorzatto, C., Machado, J.P.B., Lopes, K.V.G., Nascimento, K.J.T., Pereira, W.A., Brustolini,  
1102 O.J.B., et al. (2015) NIK1-mediated translation suppression functions as a plant antiviral immunity  
1103 mechanism. *Nature*, 520, 679–682. <https://doi.org/10.1038/nature14171>.
- 1104 Zvereva, A.S., Golyaev, V., Turco, S., Gubaeva, E.G., Rajeswaran, R., Schepetilnikov, M.V., et al.  
1105 (2016) Viral protein suppresses oxidative burst and salicylic acid-dependent autophagy and  
1106 facilitates bacterial growth on virus-infected plants. *The New Phytologist*, 211, 1020–1034.  
1107 <https://doi.org/10.1111/nph.13967>.
- 1108 Zvereva, A.S. & Pooggin, M.M. (2012) Silencing and innate immunity in plant defense against  
1109 viral and non-viral pathogens. *Viruses*, 4, 2578–2597. <https://doi.org/10.3390/v4112578>.
- 1110
- 1111

1112 **Supplemental data**

1113 Provided in this file:

1114 Table S1: Oligonucleotides used for RT-qPCR

1115 Table S2: Aligned reads for transcriptome profiling

1116 Figure S1. Validation of Illumina RNA-seq expression data by quantitative reverse-transcription  
1117 PCR (RT-qPCR)

1118 Figure S2: Gene ontology analysis showing the Top 25 GO of deregulated processes

1119 Figure S3: Supplementary heatmaps

1120

1121 Provided as extra files:

1122 Supplementary Dataset S1 Plant mRNA-seq.xlsx

1123 Supplementary Dataset S2 Heatmaps DEGs List.xlsx

1124 Supplementary Sequence Information S1 on CaMV and TuYV.docx

1125

1126 Table S1: Oligonucleotides used for RT-qPCR

| Gene                | Organism           | Primers                                                                                 |
|---------------------|--------------------|-----------------------------------------------------------------------------------------|
| AT5G25760 (PEX4)    | <i>A. thaliana</i> | Forward primer<br>TGCAACCTCCTCAAGTTCGA<br>Reverse primer<br>GCAGGACTCCAAGCATTCTT        |
| AT2G18700 (TPS11)   | <i>A. thaliana</i> | Forward primer<br>AAGTTTTGGGCGATGGGTCA<br>Reverse primer<br>CGAGAACCCTTTCCCACGA         |
| AT1G61800 (GPT2)    | <i>A. thaliana</i> | Forward primer<br>AGTGTCAATTTCTTGATCAGACCATC<br>Reverse primer<br>CCAGTAGCGACACACCTCAAT |
| AT4G39030 (EDS5)    | <i>A. thaliana</i> | Forward primer<br>ACCCTAGCGACAAATGACAGC<br>Reverse primer<br>TCACTTGCTCCATTATTAACCTGC   |
| AT1G31280 (AGO2)    | <i>A. thaliana</i> | Forward primer<br>ATGCTGACAAGGCTGCTTCT<br>Reverse primer<br>CAGAAGACGAAGACGCTCCA        |
| AT4G26530 (FBA5)    | <i>A. thaliana</i> | Forward primer<br>TTGGTTGCCATTTGGTTGTGT<br>Reverse primer<br>CTGAAGAGGACGAGGATGCC       |
| AT3G26830 (PAD3)    | <i>A. thaliana</i> | Forward primer<br>AGGGCAAGGAAAATGTCGGT<br>Reverse primer<br>CAGGGGTAAGAGGACGAGGA        |
| AT5G42650 (AOS)     | <i>A. thaliana</i> | Forward primer<br>TCACGATGGGAGCGATTGAG<br>Reverse primer<br>ACCGTATTGAGCCGTAACCG        |
| AT4G13770 (CYP83A1) | <i>A. thaliana</i> | Forward primer<br>AGGAACAACGGTCAACGTCA<br>Reverse primer<br>CGGTCCCCATTCTTTCTCGT        |

1127

1128

1129 Table S2: Aligned reads for transcriptome profiling

| Sample name | Aligned reads | Assigned Reads | Mapped Ratio |
|-------------|---------------|----------------|--------------|
| Ara_M2      | 34,670,703    | 31,998,776     | 92,3%        |
| Ara_M3      | 31,050,325    | 28,078,404     | 90,4%        |
| Ara_M4      | 29,883,629    | 26,930,049     | 90,1%        |
| Ara_C1      | 33,833,716    | 27,677,748     | 81,8%        |
| Ara_C2      | 30,911,854    | 24,741,132     | 80,0%        |
| Ara_C3      | 30,653,084    | 24,528,34      | 80,0%        |
| Ara_T1      | 29,290,278    | 25,109,740     | 85,7%        |
| Ara_T2      | 32,381,425    | 28,898,406     | 89,2%        |
| Ara_T3      | 32,197,738    | 28,344,993     | 88,0%        |

1130

| Sample name | Aligned reads | Assigned Reads | Mapped Ratio |
|-------------|---------------|----------------|--------------|
| Cam_M1      | 33,109,309    | 22,574,696     | 68,2%        |
| Cam_M2      | 32,233,737    | 22,145,697     | 68,7%        |
| Cam_M3      | 33,890,114    | 22,984,537     | 67,8%        |
| Cam_C1      | 38,817,320    | 24,936,094     | 64,2%        |
| Cam_C2      | 31,267,901    | 20,165,623     | 64,5%        |
| Cam_C3      | 28,166,913    | 17,126,400     | 60,8%        |
| Cam_T1      | 29,673,896    | 20,168,532     | 68,0%        |
| Cam_T2      | 29,764,440    | 20,762,349     | 69,8%        |
| Cam_T3      | 34,740,771    | 24,509,728     | 70,6%        |

1131



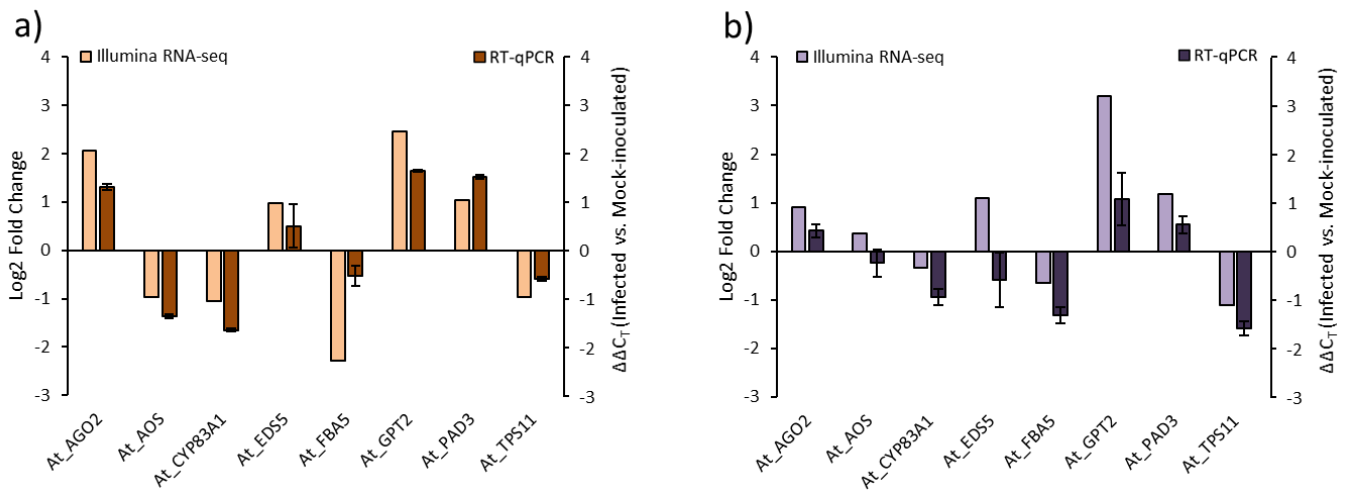

1132  
1133

1134 Figure S1. Validation of Illumina RNA-seq expression data by quantitative reverse-transcription PCR (RT-qPCR). a) CaMV-infected Arabidopsis. b) TuYV-infected Arabidopsis. The y-axis presents the normalized log<sub>2</sub> fold change of expression derived from Illumina RNA-seq read counts and PCR  $\Delta\Delta C_T$ , respectively. The TAIR gene loci of the tested mRNAs are: At\_AGO2, AT1G31280; At\_AOS, AT5G42650; At\_CYP83A1, AT4G13770; At\_EDS5, AT4G39030; At\_FBA5, AT4G26530; At\_GPT2, AT1G61800; At\_PAD3, AT3G26830; At\_TPS11, AT2G18700.

1139

a) Common DEGs between CaMV- and TuYV-infected Arabidopsis

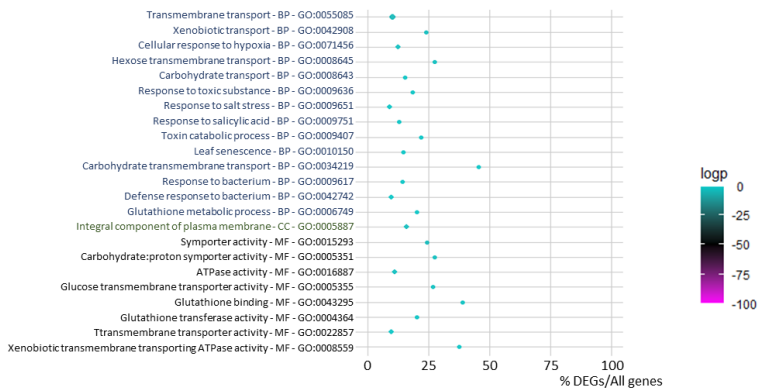

b) Common DEGs between CaMV- and TuYV-infected Camelina

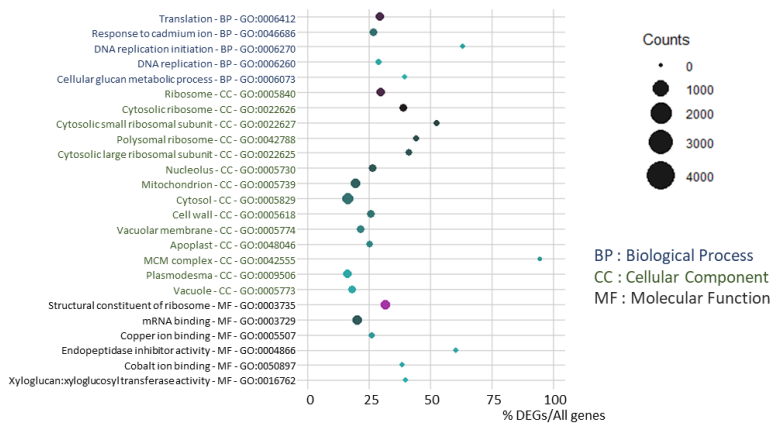

1140

1141 Figure S2: Gene ontology analysis showing the Top 25 GO of deregulated processes. a) common DEGs (n=956) between CaMV-infected and TuYV-infected Arabidopsis and b) common DEGs (n=6,692) between CaMV-infected and TuYV-infected Camelina. GO IDs and corresponding GO terms are specified in the vertical axis. For each category (BP: Biological Process, CC: Cellular Component and MF: Molecular Function), GOs are sorted according to decreasing log<sub>2</sub> (1/p-value), also indicated by the color of each spot, in order to place most significantly enriched GOs on top of the graph. The absolute number of DEGs that matched the GO term is indicated by the size of each spot, whereas the horizontal axis shows the ratio of DEGs vs. all genes belonging to the GO term.

1147

1148

1149 **Supplementary heatmaps**

1150

1151 Callose deposition is induced via pathogen molecular pattern- and pathogen effector-triggered  
 1152 immunity pathways. We found that expression of genes related to callose deposition was only slightly  
 1153 deregulated in aphid-infested infected plants except for a strong upregulation of *SWEET13* in  
 1154 Camelina infected with CaMV or TuYV, and a slight downregulation of *BHLH89* in CaMV-infected  
 1155 Arabidopsis and Camelina. *SWEET13* is a sugar transporter and there is no direct link with callose  
 1156 (at least I did not find any, even if there is callose deposition in the Arabidopsis GO annotation).  
 1157 *BHLH89* is a transcription factor that is upstream of callose deposition; (no more information). *UGP1*  
 1158 was virus-specifically upregulated in TuYV-infected Camelina and Arabidopsis and downregulated  
 1159 in CaMV-infected plants. *UGP1* (AT3G03250) is a UDP-glucose pyrophosphorylase and involved  
 1160 in the first synthesis steps of cellulose and other sugar polymers (PMID 29569779) such as callose.  
 1161

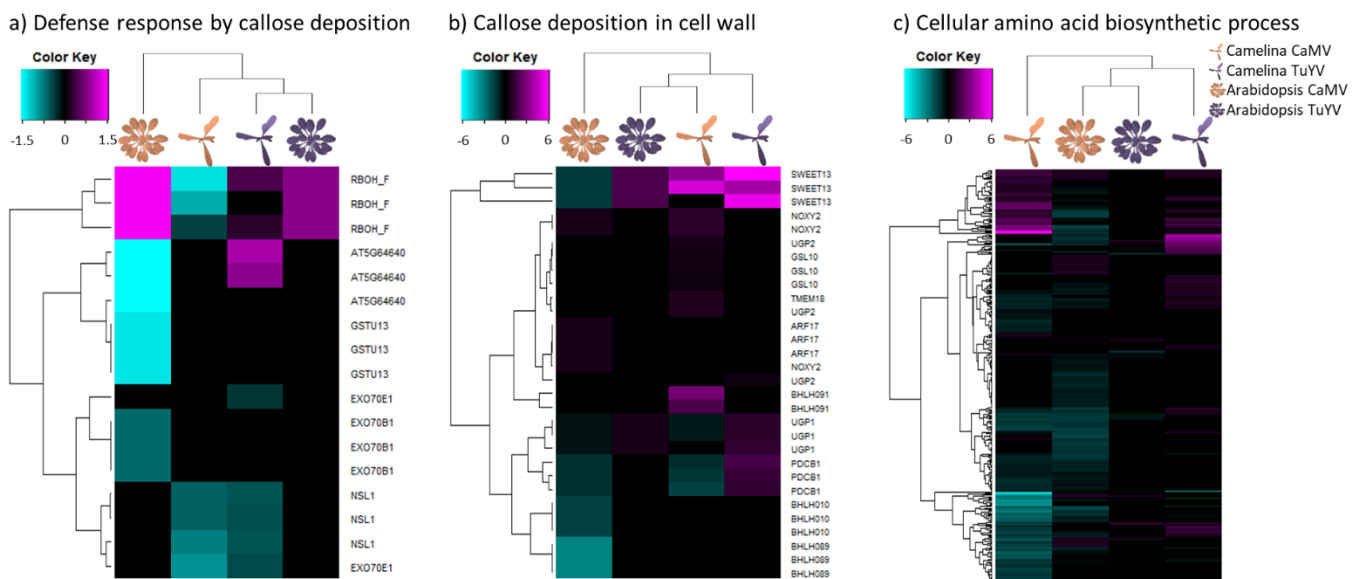

1162

1163 Figure S3. Hierarchical clustering of differentially expressed genes (DEGs) related to a) Defense response by callose  
 1164 deposition (GO:0052542), b) Callose deposition in cell wall (GO:0052543) and c) Cellular amino acid biosynthetic  
 1165 process (GO:0008652) in CaMV- and TuYV-infected *Arabidopsis thaliana* and *Camelina sativa* compared to their mock-  
 1166 inoculated relatives (Supplementary Dataset S2). The color keys show log<sub>2</sub>fold changes as indicated below the keys in  
 1167 gradients from the minimal value in cyan to the maximal value in magenta.

1168
